# Supplementary material
Source: publisher figshare collection journal article supplement (https://gsajournals.figshare.com/ndownloader/files/26510930)
Supplement: Supplementary file 1 [file 26510930]

## Sheet: AR4307 115seq
Supplementary Table 3. Summary of cytochrome oxydases (CYP) found in the predicted proteome of Nectriaceous fungi							Best hit of Nelson's
AA SeqName	Description (Based on BlastP best hit)	Name of hit [ on Fungal Cytochrome P450 Database]	Identity [%]	P450 Class Name	putative CPY name		AA SeqName	Nelson's P450 Name	Species name	Identity	E-value
2483.t1	Eburicol 14-alpha-demethylase	[ P450_Fs085 ] estExt_Genewise1.C_sca_1_chr1_3_00465 [Fusarium solani f. batatas]	88.04	E-class P450, group IV	CYP51		3197.t1	CYP5093A4	Aspergillus oryzae	1	0
3770.t1	Cytochrome P450 monooxygenase mpaDE	[ P450_Fs055 ] e_gw1.32.144.1 [Fusarium solani f. batatas]	86.25	E-class P450, group I	CYP531		9581.t1	CYP630D2P	Aspergillus oryzae	1	1e-113
5088.t1	Cytochrome P450	[ P450_Fs072 ] e_gw1.47.62.1 [Fusarium solani f. batatas]	85.11	E-class P450, group I	CYP504		11194.t1	CYP548A1	Neurospora crassa	1	0
9853.t1	cytochrome P450	[ P450_Fs046 ] e_gw1.82.113.1 [Fusarium solani f. batatas]	84.07	E-class P450, group I	CYP663		3562.t1	CYP590A1	Magnaporthe grisea	1	0
11661.t1	related to O-methylsterigmatocystin oxidoreductase	[ P450_Fs007 ] e_gw1.1.1600.1 [Fusarium solani f. batatas]	83.93		CYP5065		5453.t1	CYP5089A1c	Aspergillus fumigatus	1	0
7669.t1	cytochrome P450-like protein	[ P450_Fs161 ] estExt_fgenesh1_pm.C_sca_3_chr4_2_00228 [Fusarium solani f. batatas]	83.36	Pisatin demethylase-like	CYP548		932.t1	CYP630D1	Aspergillus oryzae	0.9806	0
3183.t1	Cytochrome P450 61	[ P450_Tvg006 ] fgenesh1_pm.C_scaffold_20000074 [Trichoderma virens Gv29-8]	81.51	E-class P450, group I	CYP61		3770.t1	CYP5014J1	Phytophthora sojae	0.97	0
10632.t1	cytochrome P450 oxidoreductase	[ P450_Fo153 ] FOXG_16987 [Fusarium oxysporum]	81.27		CYP540		11551.t1	CYP504A4	Magnaporthe grisea	0.9691	0
487.t1	related to pisatin demethylase cytochrome P450	[ P450_Fs005 ] e_gw1.8.73.1 [Fusarium solani f. batatas]	80.8		CYP532		8134.t1	CYP504A4	Magnaporthe grisea	0.9691	0
2555.t1	Cytochrome P450 61	[ P450_Fs088 ] estExt_Genewise1Plus.C_sca_82_chr10_2_00600 [Fusarium solani f. batatas]	80.78	E-class P450, group IV	CYP61		9322.t1	CYP58D2	Aspergillus oryzae	0.95	0
1424.t1	related to pisatin demethylase	[ P450_Fs029 ] e_gw1.20.1304.1 [Fusarium solani f. batatas]	80.64	E-class P450, group I	CYP570		3028.t1	CYP5014G1	Phytophthora sojae	0.8504	1e-177
9054.t1	related to cytochrome P450 monooxygenase (lovA)	[ P450_Fs048 ] e_gw1.14.510.1 [Fusarium solani f. batatas]	80.27	E-class P450, group I	CYP602		4203.t1	CYP61A1	Fusarium graminearum	0.7989	0
7010.t1	3-hydroxyphenylacetate 6-hydroxylase	[ P450_Fo051 ] FOXG_07489 [Fusarium oxysporum]	79.53	E-class P450, group I	CYP504		9853.t1	CYP540B1	Magnaporthe grisea	0.7878	0
3153.t1	Cytochrome P450 55A3	[ P450_Fs027 ] e_gw1.33.219.1 [Fusarium solani f. batatas]	78.57		CYP55		7271.t1	CYP60B1	Aspergillus nidulans	0.7694	0
7003.t1	Eburicol 14-alpha-demethylase	[ P450_Fs030 ] e_gw1.20.745.1 [Fusarium solani f. batatas]	77.64		CYP51		2105.t1	CYP548A3	Fusarium graminearum	0.7609	0
8181.t1	related to trichodiene oxygenase cytochrome P450	[ P450_Fo019 ] FOXG_03513 [Fusarium oxysporum]	77.59	E-class P450, group I	CYP580		4554.t1	CYP602B1	Fusarium graminearum	0.6853	0
4554.t1	Benzoate 4-monooxygenase	[ P450_Fs014 ] e_gw1.44.98.1 [Fusarium solani f. batatas]	77.4	Pisatin demethylase-like	CYP53		7003.t1	CYP505A7	Fusarium graminearum	0.6721	0
1882.t1	Cytochrome P450	[ P450_Fs136 ] fgenesh1_pg.sca_29_chr12_4_0000015 [Fusarium solani f. batatas]	76.69	E-class P450, group I	CYP5058		7669.t1	CYP617A1	Fusarium graminearum	0.6382	0
8564.t1	cytochrome P450	[ P450_Fs021 ] e_gw1.60.34.1 [Fusarium solani f. batatas]	76.61	E-class P450, group I	CYP505		6607.t1	CYP60A5	Aspergillus oryzae	0.6242	1e-179
6849.t1	3-hydroxyphenylacetate 6-hydroxylase	[ P450_048 ] CH063_02473T0 [Colletotrichum higginsianum]	75.84	E-class P450, group I	CYP504		3153.t1	CYP5090A1b	Aspergillus fumigatus	0.6222	1e-163
4525.t1	cytochrome P450	[ P450_125 ] CH063_07685T0 [Colletotrichum higginsianum]	75.65	E-class P450, group I	CYP541		3563.t1	CYP528A2	Magnaporthe grisea	0.5683	1e-137
5084.t1	benzoate 4-monooxygenase cytochrome P450, putative	[ P450_Pm100 ] EEA20889.1 [Penicillium marneffei]	75.62		CYP577		3905.t1	CYP539A3	Fusarium graminearum	0.5557	0
162.t1	related to pisatin demethylase (cytochrome P450)	[ P450_Fv005 ] FVEG_00415 [Fusarium verticillioides]	75.6	E-class P450, group I	CYP570		10993.t1	CYP5037B3	Phanerochaete chrysosporium	0.5531	1e-149
4203.t1	Cytochrome P450 monooxygenase lolP1	[ P450_Fs160 ] estExt_fgenesh1_pm.C_sca_1_chr1_3_00670 [Fusarium solani f. batatas]	75	E-class P450, group I	CYP535		8564.t1	CYP528A2	Magnaporthe grisea	0.5519	1e-73
9191.t1	cytochrome P450	[ P450_Fs127 ] fgenesh1_pg.sca_6_chr9_2_0000613 [Fusarium solani f. batatas]	74.75	E-class P450, group I	CYP680		12223.t1	CYP584D1	Fusarium graminearum	0.5436	1e-158
3905.t1	related to n-alkane-inducible cytochrome P450	[ P450_Fs018 ] e_gw1.2.182.1 [Fusarium solani f. batatas]	74.2	P450, CYP52	CYP584		12424.t1	CYP53C1	Ustilago maydis 521	0.5194	1e-139
5098.t1	Bifunctional P-450:NADPH-P450 reductase	[ P450_Fs129 ] fgenesh1_pg.sca_82_chr10_2_0000349 [Fusarium solani f. batatas]	74.2	E-class P450, group I	CYP505		2483.t1	CYP61A1	Aspergillus oryzae	0.5188	1e-140
4538.t1	cytochrome p450 benzoate 4-monooxygenase	[ P450_Pm008 ] EEA27553.1 [Penicillium marneffei]	73.64	Pisatin demethylase-like	CYP53		7687.t1	CYP682D1	Aspergillus nidulans	0.5169	2e-25
8029.t1	related to cytochrome P450 94A1	[ P450_Fg072 ] FGSG_08377.3 [Fusarium graminearum]	73.29		CYP544		580.t1	CYP5150A4	Phanerochaete chrysosporium	0.5072	1e-145
12424.t1	cytochrome P450 oxidoreductase	[ P450_Fs063 ] e_gw1.29.200.1 [Fusarium solani f. batatas]	73.28	Pisatin demethylase-like	CYP5078		4479.t1	CYP5150A4	Phanerochaete chrysosporium	0.5072	1e-145
2425.t1	related to isotrichodermin C-15 hydroxylase (cytochrome P-450 monooxygenase CYP65A1)	[ P450_Fs156 ] estExt_fgenesh1_pg.C_sca_1_chr1_3_00312 [Fusarium solani f. batatas]	72.57		CYP617		8029.t1	CYP5103B1	Aspergillus oryzae	0.5024	1e-114
10966.t1	related to cytochrome P450 CYP3/CYP5/CYP6/CYP9 subfamilies	[ P450_Fs103 ] fgenesh1_pm.sca_11_chr8_3_0000226 [Fusarium solani f. batatas]	72.44	E-class P450, group I	CYP673		4410.t1	CYP68D1	Neurospora crassa	0.4981	1e-140
4070.t1	cholesterol 7-alpha-monooxygenase	[ P450_Fs110 ] fgenesh1_pm.sca_55_chr13_4_0000011 [Fusarium solani f. batatas]	71.87	E-class P450, group I	CYP642		2425.t1	CYP618A1	Fusarium graminearum	0.4921	1e-138
7724.t1	cytochrome P450 52E1	[ P450_Fs017 ] e_gw1.2.838.1 [Fusarium solani f. batatas]	71.39	P450, CYP52	CYP538		10741.t1	CYP51F1	Cryptococcus gattii WM276	0.4862	1e-127
10741.t1	related to n-alkane-inducible cytochrome P450	[ P450_Fv008 ] FVEG_01415 [Fusarium verticillioides]	71.35	P450, CYP52	CYP539		1322.t1	CYP538A1	Neurospora crassa	0.4815	1e-135
9427.t1	probable benzoate 4-monooxygenase cytochrome P450	[ P450_Fs162 ] estExt_fgenesh1_pm.C_sca_10_chr8_2_00253 [Fusarium solani f. batatas]	70.93	E-class P450, group I	CYP537		5465.t1	YP52H2b	Aspergillus fumigatus	0.4776	1e-123
3028.t1	averantin oxidoreductase	[ P450_Vd042 ] VDAG_06706 [Verticillium dahliae VdLs. 17]	69.88	Pisatin demethylase-like	CYP65		3792.t1	CYP52H2b	Aspergillus fumigatus	0.4659	1e-119
3563.t1	cytochrome p450	[ P450_Fs024 ] e_gw1.5.1131.1 [Fusarium solani f. batatas]	69.76	E-class P450, group I	CYP534		8095.t1	CYP5077A1	Aspergillus nidulans	0.4656	1e-125
5659.t1	cytochrome p450	[ P450_Tvg013 ] e_gw1.10.142.1 [Trichoderma virens Gv29-8]	69.7	E-class P450, group I	CYP621		4415.t1	CYP584G1	Aspergillus oryzae	0.4644	1e-126
7687.t1	cytochrome P450	[ P450_Tvg004 ] e_gw1.20.371.1 [Trichoderma virens Gv29-8]	68.2	P450, CYP52	CYP655		7445.t1	CYP561D1	Fusarium graminearum	0.4635	1e-137
1337.t1	probable cycloheximide-inducible protein CIP70 (cytochrome P450 family)	[ P450_Fo005 ] FOXG_01238 [Fusarium oxysporum]	68.14	E-class P450, CYP2D	CYP54		1531.t1	CYP5078A3	Aspergillus nidulans	0.455	4e-44
580.t1	cytochrome P450	[ P450_Tvg054 ] e_gw1.14.457.1 [Trichoderma virens Gv29-8]	68.01	Pisatin demethylase-like	CYP65		1882.t1	CYP5137A2	Phanerochaete chrysosporium	0.4428	1e-125
1645.t1	cytochrome P450	[ P450_Ate006 ] ATEG_00738.1 [Aspergillus terreus]	67.67	E-class P450, group I	CYP680		1424.t1	CYP621A1	Fusarium graminearum	0.4411	1e-121
1282.t1	related to pisatin demethylase	[ P450_Fg029 ] FGSG_02458.3 [Fusarium graminearum]	67.18	E-class P450, group I	CYP528		1865.t1	CYP5139A1	Phanerochaete chrysosporium	0.4314	1e-105
622.t1	cytochrome P450	[ P450_PCR077 ] CAP97144.1 [Penicillium chrysogenum]	66.6		CYP5052		7239.t1	CYP65AF1	Aspergillus oryzae	0.4247	1e-100
2105.t1	related to cytochrome p450	[ P450_Fs009 ] e_gw1.18.1867.1 [Fusarium solani f. batatas]	65.61	E-class P450, group I	CYP621		9054.t1	CYP5027A1	Ustilago maydis 521	0.4212	1e-115
11551.t1	related to pisatin demethylase cytochrome P450	[ P450_Vdm021 ] VDBG_03058 [Verticillium albo-atrum VaMs. 102]	65.04	E-class P450, group I	CYP628		1282.t1	CYP504A1	Aspergillus nidulans	0.4212	3e-81
3197.t1	related to cytochrome P450 7B1	[ P450_Fg039 ] FGSG_03498.3 [Fusarium graminearum]	64.92		CYP637		3183.t1	CYP5027A1	Ustilago maydis 521	0.4204	1e-125
3290.t1	O-methylsterigmatocystin oxidoreductase	[ P450_Fo085 ] FOXG_11744 [Fusarium oxysporum]	64.51	E-class P450, group I	CYP620		10762.t1	CYP5027A1	Ustilago maydis 521	0.4154	1e-116
8587.t1	cytochrome P450	[ P450_Fs038 ] e_gw1.22.33.1 [Fusarium solani f. batatas]	64.03	E-class P450, group I	CYP620		5980.t1	CYP584G1	Aspergillus oryzae	0.4143	1e-99
7445.t1	pisatin demethylase	[ P450_Fs001 ] gw1.27.66.1 [Fusarium solani f. batatas]	63.86	Pisatin demethylase-like	CYP675		12662.t1	CYP584G1	Aspergillus oryzae	0.4143	1e-99
10762.t1	related to pisatin demethylase cytochrome P450	[ P450_Fv123 ] FVEG_13835 [Fusarium verticillioides]	62.43	E-class P450, group I	CYP628		3271.t1	CYP584G1	Aspergillus oryzae	0.4143	1e-99
5980.t1	cytochrome P450 oxidoreductase	[ P450_Fg037 ] FGSG_03260.3 [Fusarium graminearum]	62.4		CYP5080		9427.t1	CYP530A3	Aspergillus nidulans	0.3964	3e-97
1488.t1	cytochrome P450	[ P450_Pa097 ] Pa_1_23520 [Podospora anserina]	62.2	E-class P450, group I	CYP682		162.t1	CYP530A2	Fusarium graminearum	0.3959	8e-37
1865.t1	cytochrome P450 monooxygenase	[ P450_Ta040 ] 79290 [Trichoderma atroviride]	61.93		CYP526		11661.t1	CYP548A1	Neurospora crassa	0.3924	2e-93
12223.t1	cytochrome P450 8B1	[ P450_Fs020 ] e_gw1.31.239.1 [Fusarium solani f. batatas]	61.38	P450, CYP52	CYP634		10966.t1	CYP530A2	Fusarium graminearum	0.3879	4e-28
6068.t1	cytochrome P450	[ P450_Fg053 ] FGSG_05334.3 [Fusarium graminearum]	61.35	E-class P450, group IV	CYP559		623.t1	CYP5014D3	Phytophthora sojae	0.3676	1e-78
7271.t1	Cytochrome P450	[ P450_Tr050 ] fgenesh5_pg.C_scaffold_17000141 [Trichoderma reesei]	61.03	Pisatin demethylase-like	CYP621		1330.t1	CYP5014D3	Phytophthora sojae	0.3658	1e-80
3094.t1	benzoate 4-monooxygenase cytochrome P450	[ P450_Fs092 ] fgenesh1_pm.sca_18_chr2_1_0000195 [Fusarium solani f. batatas]	60.92	E-class P450, group I	CYP616		5871.t1	CYP675A1	Aspergillus nidulans	0.3622	1e-93
3792.t1	cytochrome P450	[ P450_Fs051 ] e_gw1.30.40.1 [Fusarium solani f. batatas]	60.83	E-class P450, group I	CYP671		487.t1	CYP5093A1	Aspergillus oryzae	0.3581	4e-36
9322.t1	O-methylsterigmatocystin oxidoreductase	[ P450_Fs065 ] e_gw1.29.28.1 [Fusarium solani f. batatas]	60.15	E-class P450, group I	CYP620		5098.t1	CYP5069A1c	Aspergillus fumigatus	0.3562	3e-24
8279.t1	cytochrome P450	[ P450_Fs109 ] fgenesh1_pm.sca_85_chr13_3_0000003 [Fusarium solani f. batatas]	59.89	Pisatin demethylase-like	CYP62		5494.t1	CYP620A1	Fusarium graminearum	0.3405	7e-29
7243.t1	cytochrome P450	[ P450_Fs081 ] e_gw1.92.22.1 [Fusarium solani f. batatas]	59.68	E-class P450, group I	CYP632		3290.t1	CYP5157A1	Phanerochaete chrysosporium	0.3401	1e-37
5465.t1	cytochrome P450	[ P450_Tr062 ] fgenesh1_pm.C_scaffold_29000033 [Trichoderma reesei]	59.28		CYP65		5659.t1	CYP53C2	Phanerochaete chrysosporium	0.3311	2e-54
8314.t1	flavonoid 3',5'-hydroxylase	[ P450_069 ] CH063_03872T0 [Colletotrichum higginsianum]	58.97	E-class P450, group I	CYP573		7243.t1	CYP512E1	Phanerochaete chrysosporium	0.3223	6e-55
565.t1	O-methylsterigmatocystin oxidoreductase	[ P450_Fs065 ] e_gw1.29.28.1 [Fusarium solani f. batatas]	57.9	E-class P450, group I	CYP620		6068.t1	CYP611A1	Magnaporthe grisea	0.3163	8e-55
1531.t1	related to pisatin demethylase (cytochrome P450)	[ P450_Fg033 ] FGSG_02929.3 [Fusarium graminearum]	57.31		CYP570		7724.t1	CYP633A1	Fusarium graminearum	0.2976	5e-66
4410.t1	fatty acid hydroxylase	[ P450_Mc040 ] MCYG_04850 [Microsporum canis]	56.39		CYP505		6116.t1	CYP685A1	Aspergillus nidulans	0.297	5e-39
1330.t1	Cytochrome P450 monooxygenase yanH	[ P450_Fs121 ] fgenesh1_pg.sca_20_chr6_4_0000622 [Fusarium solani f. batatas]	55.91	E-class P450, group I	CYP62		1645.t1	CYP680A1	Aspergillus nidulans	0.2926	4e-50
1322.t1	cytochrome P450	[ P450_Fs008 ] e_gw1.18.1030.1 [Fusarium solani f. batatas]	55.69	P450, CYP52	CYP68		1919.t1	CYP5136A3	Phanerochaete chrysosporium	0.2916	3e-41
8134.t1	related to pisatin demethylase cytochrome P450	[ P450_Vdm021 ] VDBG_03058 [Verticillium albo-atrum VaMs. 102]	55.22	E-class P450, group I	CYP628		4070.t1	CYP665A1	Aspergillus nidulans	0.2902	7e-40
4479.t1	cytochrome P450	[ P450_Tvg054 ] e_gw1.14.457.1 [Trichoderma virens Gv29-8]	55.15	Pisatin demethylase-like	CYP65		3793.t1	CYP5014B1	Phytophthora ramorum	0.2889	2e-36
12662.t1	cytochrome p450 oxidoreductase	[ P450_Fg037 ] FGSG_03260.3 [Fusarium graminearum]	54.93		CYP5080		11081.t1	CYP530A3	Aspergillus nidulans	0.2888	1e-42
3271.t1	cytochrome p450 oxidoreductase	[ P450_Fg037 ] FGSG_03260.3 [Fusarium graminearum]	54.93		CYP5080		1488.t1	CYP584E5	Aspergillus oryzae	0.2861	3e-27
5494.t1	cytochrome P450	[ P450_Cg072 ] GLRG_08937T0 [Colletotrichum graminicola M1.001]	54.78	E-class P450, CYP2A	CYP505		7016.t1	CYP63A3	Phanerochaete chrysosporium	0.2769	6e-39
8095.t1	cytochrome P450	[ P450_Tr046 ] e_gw1.15.246.1 [Trichoderma reesei]	54	Pisatin demethylase-like	CYP65		8181.t1	CYP547C3	Aspergillus oryzae	0.2751	1e-30
7239.t1	benzoate 4-monooxygenase cytochrome P450	[ P450_Ate079 ] ATEG_07093.1 [Aspergillus terreus]	53.61	E-class P450, group I	CYP65		9191.t1	CYP504B5b	Aspergillus fumigatus	0.2725	1e-47
9581.t1	cytochrome P450	[ P450_Mf063 ] e_gw1.18.265.1 [Mycosphaerella fijiensis]	53.38	Pisatin demethylase-like	CYP65		1337.t1	CYP530A3	Aspergillus nidulans	0.2678	9e-43
1919.t1	cytochrome p450 7b1	[ P450_Fs096 ] fgenesh1_pm.sca_12_chr5_2_0000075 [Fusarium solani f. batatas]	52.6		CYP641		9504.t1	CYP530A3	Aspergillus nidulans	0.2648	1e-41
932.t1	cytochrome P450	[ P450_Ts142 ] TSTA_058020 [Talaromyces stipitatus]	52.41	Pisatin demethylase-like	CYP512		6849.t1	CYP540B1	Magnaporthe grisea	0.2643	1e-20
3793.t1	Isotrichodermin C-15 hydroxylase	[ P450_Cp099 ] fgenesh1_pm.C_scaffold_4000688 [Cryphonectria parasitica]	51.28	Pisatin demethylase-like	CYP65		8674.t1	CYP5014F1	Phytophthora ramorum	0.2598	3e-35
10993.t1	Cytochrome P450	[ P450_013 ] CH063_00886T0 [Colletotrichum higginsianum]	50.87		CYP623		7010.t1	CYP530A3	Aspergillus nidulans	0.2593	3e-30
11194.t1	cytochrome P450	[ P450_AnA063 ] e_gw1.2.1446.1 [Aspergillus niger ATCC 1015]	50.56	Pisatin demethylase-like	CYP532		2555.t1	CYP539B1	Magnaporthe grisea	0.2573	1e-26
9504.t1	related to benzoate 4-monooxygenase cytochrome P450	[ P450_Fs077 ] e_gw1.28.288.1 [Fusarium solani f. batatas]	50.52	E-class P450, group I	CYP537		622.t1	CYP5015A1	Phytophthora ramorum	0.256	5e-33
11081.t1	benzoate 4-monooxygenase cytochrome P450	[ P450_Nf056 ] NFIA_099450 [Neosartorya fischeri]	48.91	E-class P450, group I	CYP630		8279.t1	CYP512F1	Phanerochaete chrysosporium	0.2559	3e-28
6607.t1	cytochrome P450 6A1	[ P450_Tr051 ] fgenesh1_pm.C_scaffold_18000022 [Trichoderma reesei]	48.89	Pisatin demethylase-like	CYP609		12301.t1	CYP5032A1	Ustilago maydis 521	0.2527	2e-36
3562.t1	cupin -type protein	[ P450_Tt018 ] estExt_fgenesh2_pm.C_21000 [Thielavia terrestris]	47.56	E-class P450, group I	CYP534		8587.t1	CYP530A3	Aspergillus nidulans	0.2526	5e-31
12301.t1	CypX, Cytochrome P450	[ P450_Ptr016 ] PTRG_02979 [Pyrenophora tritici-repentis]	47.54	E-class P450, CYP3A	CYP531		5084.t1	CYP582A1	Magnaporthe grisea	0.2524	7e-27
6784.t1	ent-kaurene oxidase	[ P450_068 ] CH063_03855T0 [Colletotrichum higginsianum]	46.15	E-class P450, group I	CYP68		4538.t1	CYP5015C1	Phytophthora sojae	0.2524	7e-34
4412.t1	Cytochrome P450 monooygenase	[ P450_Ss054 ] SS1G_08677.1 [Sclerotinia sclerotiorum]	45.9	E-class P450, group IV	CYP5085		5088.t1	CYP616A1	Fusarium graminearum	0.2517	6e-28
12002.t1	cytochrome P450 4F8	[ P450_AnC145 ] An18g00500 [Aspergillus niger CBS 513.88]	45.05		CYP5108		10632.t1	CYP5015G4	Phytophthora sojae	0.2514	9e-27
6783.t1	ent-kaurene oxidase	[ P450_068 ] CH063_03855T0 [Colletotrichum higginsianum]	44.95	E-class P450, group I	CYP68		4525.t1	CYP5015E7	Phytophthora sojae	0.2483	3e-32
5871.t1	cytochrome P450	[ P450_Tr047 ] e_gw1.15.43.1 [Trichoderma reesei]	43.57	Pisatin demethylase-like	CYP574		4859.t1	CYP547C1	Aspergillus nidulans	0.2428	2e-25
4415.t1	cytochrome P450 alkane hydroxylase	[ P450_Ss071 ] SS1G_11430.1 [Sclerotinia sclerotiorum]	43.53	P450, CYP52	CYP584		6784.t1	CYP5015E7	Phytophthora sojae	0.2415	5e-28
5453.t1	cytochrome P450	[ P450_AnA127 ] e_gw1.6.1239.1 [Aspergillus niger ATCC 1015]	42.06		CYP68		6783.t1	CYP5015E7	Phytophthora sojae	0.2415	5e-28
623.t1	cytochrome P450	[ P450_Fs125 ] fgenesh1_pg.sca_17_chr8_1_0000037 [Fusarium solani f. batatas]	40.36	E-class P450, group I	CYP5052		8314.t1	CYP5015B1	Phytophthora sojae	0.2403	2e-28
6116.t1	cytochrome P450	[ P450_Cgo086 ] CHG01339.1 [Chaetomium globosum CBS 148.51]	37.56		CYP685		12002.t1	CYP51F1	Aspergillus nidulans	0.2378	2e-30
7016.t1	cytochrome P450	[ P450_037 ] CLME202818.M [Cladonia metacorallifera]	31.55		CYP5075		3094.t1	CYP504B5b	Aspergillus fumigatus	0.2374	3e-38
4859.t1	NADPH-cytochrome P450 reductase	[ P450_Ba073 ] gm1.7036_g [Bjerkandera adusta]	27.75	E-class P450, group I	CYP505		565.t1	CYP504C1	Ustilago maydis 521	0.2161	2e-27
8674.t1	putative efflux pump antibiotic resistance protein	[ P450_Pa074 ] Pa_7_5740 [Podospora anserina]	26.7	E-class P450, group IV			4412.t1	CYP5085A1b	Aspergillus fumigatus3	0.0256	2e-67
73.t1	exopolygalacturonase	no matches					73.t1
10718.t1	cytochrome P450 oxidoreductase	no matches					10718.t1
10836.t1	cytochrome P450 oxidoreductase	no matches					10836.t1
12905.t1	thiamine pyrophosphate enzyme	no matches					12905.t1
1520.t1	Choline monooxygenase, chloroplastic	no matches					1520.t1
4602.t1	putative acetylxylan esterase A	no matches					4602.t1
4823.t1	Squalene monooxygenase	no matches					4823.t1
514.t1	transcription factor	no matches					514.t1
5952.t1	Alcohol oxidase 1	no matches					5952.t1
5960.t1	putative f-box domain protein	no matches					5960.t1
6168.t1	predicted protein [	no matches					6168.t1
7562.t1	cytochrome P450 oxidoreductase	no matches					7562.t1
8904.t1	cytochrome P450	no matches					8904.t1
8965.t1	cytochrome P450	no matches					8965.t1
9850.t1	P450 monooxygenase AflN	no matches					9850.t1

## Sheet: CBS119158 114seq
Supplementary Table 3. Summary of cytochrome oxydases (CYP) found in the predicted proteome of Nectriaceous fungi						Best hit of Nelson's
AA SeqName	Description (Based on BlastP best hit)	Name of hit [ on Fungal Cytochrome P450 Database]	Identity [%]	P450 Class Name	Putative CPY name	Nelson's P450 Name	Species name	Identity	E-value
10519.t1	cytochrome P450 oxidoreductase	[ P450_Fs063 ] e_gw1.29.200.1 [Fusarium solani f. batatas]	72.76	Pisatin demethylase-like	CYP5078	CYP53C1	Ustilago maydis 521	0.5194	1e-139
11012.t1	cytochrome P450	[ P450_Ta028 ] 90902 [Trichoderma atroviride]	43.88	e-class P450, group I	CYP574	CYP675A1	Aspergillus nidulans	0.3622	1e-93
11035.t1	averantin oxidoreductase	[ P450_057 ] CH063_03255T0 [Colletotrichum higginsianum]	48.98	e-class P450, group I	CYP65	CYP5141C1	Phanerochaete chrysosporium	0.2838	7e-24
11203.t1	cholesterol 7-alpha-monooxygenase	[ P450_Fs110 ] fgenesh1_pm.sca_55_chr13_4_0000011 [Fusarium solani f. batatas]	73.33	E-class P450, group IV	CYP642	CYP665A1	Aspergillus nidulans	0.2902	7e-40
11225.t1	predicted protein	[ P450_Fs017 ] e_gw1.2.838.1 [Fusarium solani f. batatas]	75.54	P450, CYP52	CYP538	CYP633A1	Fusarium graminearum	0.2976	5e-66
11305.t1	cytochrome P450	[ P450_Tt045 ] estExt_genemark.C_20331 [Thielavia terrestris]	40.06	Pisatin demethylase-like	CYP5075	CYP65F1	Magnaporthe grisea	0.9862	0
11428.t1	cytochrome P450 oxidoreductase	[ P450_Fs031 ] e_gw1.20.1275.1 [Fusarium solani f. batatas]	64.51	Pisatin demethylase-like	CYP5080	CYP51F1	Fusarium graminearum	0.7947	0
11546.t1	cytochrome P450	[ P450_Tr046 ] e_gw1.15.246.1 [Trichoderma reesei]	52.85	Pisatin demethylase-like	CYP65	CYP5077A1	Aspergillus nidulans	0.4656	1e-125
11618.t1	related to cytochrome P450 94A1	[ P450_Fg072 ] FGSG_08377.3 [Fusarium graminearum]	72.89		CYP544	CYP5103B1	Aspergillus oryzae	0.5024	1e-114
11640.t1	averantin oxidoreductase	[ P450_Mf063 ] e_gw1.18.265.1 [Mycosphaerella fijiensis]	53.6	Pisatin demethylase-like	CYP65	CYP630D2P	Aspergillus oryzae	1	1e-113
11881.t1	related to n-alkane-inducible cytochrome P450	[ P450_Fo001 ] FOXG_00101 [Fusarium oxysporum]	74.24		CYP539	CYP5145A1	Phanerochaete chrysosporium	0.2738	2e-39
11922.t1	cytochrome P450 oxidoreductase	[ P450_Fo153 ] FOXG_16987 [Fusarium oxysporum]	80.03		CYP540	CYP5015G4	Phytophthora sojae	0.2514	9e-27
12064.t1	averantin oxidoreductase	[ P450_Vd042 ] VDAG_06706 [Verticillium dahliae VdLs. 17]	73.39	Pisatin demethylase-like	CYP65	CYP5014G1	Phytophthora sojae	0.8504	1e-177
12324.t1	Cytochrome P450	[ P450_Cg072 ] GLRG_08937T0 [Colletotrichum graminicola M1.001]	55.92	E-class P450, CYP2A	CYP505	CYP620A1	Fusarium graminearum	0.3405	7e-29
12469.t1	Benzoate 4-monooxygenase	[ P450_Fs047 ] e_gw1.82.588.1 [Fusarium solani f. batatas]	83.54	Pisatin demethylase-like	CYP53	CYP5150A4	Phanerochaete chrysosporium	0.4972	1e-148
1250.t1	cytochrome P450	[ P450_Tr017 ] e_gw1.5.639.1 [Trichoderma reesei]	70.6	P450, CYP52	CYP655	CYP682D1	Aspergillus nidulans	0.5169	2e-25
1268.t1	related to benzoate 4-monooxygenase cytochrome P450	[ P450_Fv034 ] FVEG_04704 [Fusarium verticillioides]	83.26	Pisatin demethylase-like	CYP548	CYP5150A4	Phanerochaete chrysosporium	0.5167	4e-48
12836.t1	related to n-alkane-inducible cytochrome P450	[ P450_Fs018 ] e_gw1.2.182.1 [Fusarium solani f. batatas]	74.6	P450, CYP52	CYP584	CYP539A3	Fusarium graminearum	0.5557	0
133.t1	Isotrichodermin C-15 hydroxylase	[ P450_Cp099 ] fgenesh1_pm.C_scaffold_4000688 [Cryphonectria parasitica]	52.26	Pisatin demethylase-like	CYP65	CYP5014B1	Phytophthora ramorum	0.2889	2e-36
134.t1	cytochrome P450	[ P450_Fs051 ] e_gw1.30.40.1 [Fusarium solani f. batatas]	63.22	e-class P450, group I	CYP671	CYP52H2b	Aspergillus fumigatus	0.4659	1e-119
1433.t1	O-methylsterigmatocystin oxidoreductase	[ P450_Fo085 ] FOXG_11744 [Fusarium oxysporum]	66.15	e-class P450, group I	CYP620	CYP5157A1	Phanerochaete chrysosporium	0.3401	1e-37
1465.t1	related to SRC1-regulation of cohesion (Splice variant I)	no matches
1471.t1	predicted protein	no matches
1477.t1	related to pisatin demethylase cytochrome P450	[ P450_Vdm021 ] VDBG_03058 [Verticillium albo-atrum VaMs. 102]	65.16	e-class P450, group I	CYP628	CYP504A4	Magnaporthe grisea	0.9691	0
1482.t1	ent-kaurene oxidase	[ P450_AnA115 ] e_gw1.4.275.1 [Aspergillus niger ATCC 1015]	59.23		CYP503	CYP617D3b	Aspergillus fumigatus	1	0
1483.t1	gibberellin cluster-GA14-synthase	[ P450_Nd013 ] estExt_fgenesh2_pg.C_110241 [Neurospora discreta]	52.2		CYP680	CYP5068B1	Aspergillus oryzae	0.2797	6e-39
1486.t1	gibberellin cluster-C20-oxidase	[ P450_Cg074 ] GLRG_09074T0 [Colletotrichum graminicola M1.001]	47.09	E-class P450, group IV	CYP68	CYP5037B3	Phanerochaete chrysosporium	0.4127	3e-96
1510.t1	cytochrome P450	[ P450_Nd013 ] estExt_fgenesh2_pg.C_110241 [Neurospora discreta]	40.95		CYP68	CYP5068B1	Aspergillus oryzae	0.2797	6e-39
1525.t1	Cytochrome P450	[ P450_Fs072 ] e_gw1.47.62.1 [Fusarium solani f. batatas]	82.4	e-class P450, group I	CYP504	CYP616A1	Fusarium graminearum	0.2517	6e-28
1529.t1	benzoate 4-monooxygenase cytochrome P450, putative	[ P450_Pm100 ] EEA20889.1 [Penicillium marneffei]	76.73		CYP577	CYP582A1	Magnaporthe grisea	0.2524	7e-27
1544.t1	cytochrome P450	[ P450_Cg022 ] GLRG_02091T0 [Colletotrichum graminicola M1.001]	49.62	Pisatin demethylase-like	CYP65	CYP620H1	Aspergillus oryzae	0.4201	1e-27
1596.t1	Cytochrome P450 55A3	[ P450_Fs027 ] e_gw1.33.219.1 [Fusarium solani f. batatas]	78.25		CYP55	CYP5090A1b	Aspergillus fumigatus	0.6222	1e-163
1668.t1	CypX, Cytochrome P450	[ P450_Fs001 ] gw1.27.66.1 [Fusarium solani f. batatas]	62.5	Pisatin demethylase-like	CYP675	CYP561D1	Fusarium graminearum	0.4635	1e-137
170.t1	Squalene monooxygenase	No matches
1715.t1	cytochrome P450	no matches
1865.t1	Benzoate 4-monooxygenase	[ P450_Fs014 ] e_gw1.44.98.1 [Fusarium solani f. batatas]	77.01	PIsatin demethylase-like	CYP53	CYP602B1	Fusarium graminearum	0.6853	0
1878.t1	cytochrome p450 benzoate 4-monooxygenase	[ P450_Pm008 ] EEA27553.1 [Penicillium marneffei]	73.55	Pisatin demethylase-like	CYP53	CYP5015C1	Phytophthora sojae	0.2524	7e-34
1992.t1	related to O-methylsterigmatocystin oxidoreductase	[ P450_Fs007 ] e_gw1.1.1600.1 [Fusarium solani f. batatas]	83.74		CYP5065	CYP548A1	Neurospora crassa	0.3924	2e-93
2035.t1	cytochrome P450	[ P450_An030 ] ANID_03497 [Aspergillus nidulans FGSC A4]	37.5		CYP623	CYP5014F2	Phytophthora sojae	0.2621	7e-36
2264.t1	Flap endonuclease	no matches
231.t1	related to trichodiene oxygenase cytochrome P450	[ P450_Fo019 ] FOXG_03513 [Fusarium oxysporum]	77.59	e-class P450, group I	CYP580	CYP547C3	Aspergillus oryzae	0.2751	1e-30
2438.t1	related to pisatin demethylase cytochrome P450	[ P450_Fs005 ] e_gw1.8.73.1 [Fusarium solani f. batatas]	77.53		CYP532	CYP5093A1	Aspergillus oryzae	0.3581	4e-36
2515.t1	O-methylsterigmatocystin oxidoreductase	[ P450_Fs065 ] e_gw1.29.28.1 [Fusarium solani f. batatas]	75.14	e-class P450, group I	CYP620	CYP58D2	Aspergillus oryzae	0.95	0
2528.t1	cytochrome P450	[ P450_Tvg054 ] e_gw1.14.457.1 [Trichoderma virens Gv29-8]	68.34	Pisatin demethylase-like	CYP65	CYP5150A4	Phanerochaete chrysosporium	0.5072	1e-145
2563.t1	cytochrome P450	[ P450_Fg065 ] FGSG_08079.3 [Fusarium graminearum]	73.09	Pisatin demethylase-like	CYP53	CYP590A1	Magnaporthe grisea	0.2661	2e-51
2634.t1	cytochrome P450	[ P450_Fo112 ] FOXG_13324 [Fusarium oxysporum]	77.44	e-class P450, group I	CYP559	CYP530A1	Neurospora crassa	0.2712	8e-35
2678.t1	copper amine oxidase	no matches
2689.t1	O-methylsterigmatocystin oxidoreductase	[ P450_Fs065 ] e_gw1.29.28.1 [Fusarium solani f. batatas]	62.86	e-class P450, group I	CYP620	CYP58D2	Aspergillus oryzae	0.95	0
2908.t1	Cytochrome P450 monooxygenase mpaDE	[ P450_Fs055 ] e_gw1.32.144.1 [Fusarium solani f. batatas]	86.44	E-class P450, group I	CYP531	CYP5014J1	Phytophthora sojae	0.97	0
3206.t1	fatty acid hydroxylase	[ P450_Tr022 ] TERG_03078T0 [Trichophyton rubrum]	56.98	E-class P450, CYP3A	CYP505	CYP5032A1	Ustilago maydis 521	0.2457	2e-37
3208.t1	Cytochrome P450 monooygenase	[ P450_Bc252 ] BC1G_15526 [Botrytis cinerea]	46.61		CYP5085	CYP547C2c	Aspergillus fumigatus	0.2674	4e-39
3212.t1	cytochrome P450 monooxygenase	[ P450_BDE027 ] BDCG_07223 [Blastomyces dermatitidis ER-3]	44.9		CYP584	CYP665A1	Aspergillus nidulans	0.2821	1e-39
3226.t1	F-box domain protein	No matches
3449.t1	NADPH-cytochrome P450 reductase	[ P450_Nc012 ] NCU05185T0 [Neurospora crassa]	29.37		CYP505	CYP633A1	Fusarium graminearum	0.257	2e-25
36.t1	related to pisatin demethylase	[ P450_Fs029 ] e_gw1.20.1304.1 [Fusarium solani f. batatas]	80.43	E-class P450, group I	CYP570	CYP621A1	Fusarium graminearum	0.4411	1e-121
3832.t1	cytochrome P450	[ P450_Fs046 ] e_gw1.82.113.1 [Fusarium solani f. batatas]	84.44	e-class P450, group I	CYP663	CYP540B1	Magnaporthe grisea	0.7878	0
3873.t1	cytochrome P450 4F8	[ P450_AnC083 ] An11g00270 [Aspergillus niger CBS 513.88]	45.9	E-class P450, group IV	CYP5108	CYP51F1	Aspergillus nidulans	0.2378	2e-30
3932.t1	cupin -type protein	[ P450_Tt018 ] estExt_fgenesh2_pm.C_21000 [Thielavia terrestris]	51.33	e-class P450, group I	CYP534	CYP590A1	Magnaporthe grisea	1	0
3933.t1	cytochrome p450	[ P450_Fs024 ] e_gw1.5.1131.1 [Fusarium solani f. batatas]	70.52	e-class P450, group I	CYP534	CYP528A2	Magnaporthe grisea	0.5683	1e-137
4177.t1	related to cytochrome P450 7B1	[ P450_Fo147 ] FOXG_16528 [Fusarium oxysporum]	65		CYP637	CYP5093A4	Aspergillus oryzae	1	0
4189.t1	Cytochrome P450 61	[ P450_Fv064 ] FVEG_08786 [Fusarium verticillioides]	81.22		CYP61	CYP505D6	Phanerochaete chrysosporium	0.6377	0
4268.t1	probable cycloheximide-inducible protein CIP70 (cytochrome P450 family)	[ P450_Fs114 ] fgenesh1_pg.sca_26_chr2_2_0000090 [Fusarium solani f. batatas]	70.37	E-class P450, group IV	CYP548	CYP51F1	Ustilago maydis 521	0.5444	1e-145
4275.t1	benzoate 4-monooxygenase cytochrome p450	[ P450_Ts115 ] TSTA_098080 [Talaromyces stipitatus]	55	e-class P450, group I	CYP62	CYP61A6	Aspergillus oryzae	1	0
4283.t1	cytochrome P450	[ P450_Fs008 ] e_gw1.18.1030.1 [Fusarium solani f. batatas]	58.19	P450, CYP52	CYP68	CYP538A1	Neurospora crassa	0.4815	1e-135
4429.t1	NADPH--cytochrome P450 reductase	[ P450_Pc108 ] gww2.3.2.1 [Phanerochaete chrysosporium]	30.26	e-class P450, group I	CYP505	CYP681A1	Aspergillus nidulans	0.3709	6e-94
4431.t1	cytochrome P450 oxidoreductase	[ P450_Fs022 ] e_gw1.61.48.1 [Fusarium solani f. batatas]	78.77		CYP630	CYP559B1	Magnaporthe grisea	0.4742	1e-131
465.t1	cytochrome P450 6A1	[ P450_Tr051 ] fgenesh1_pm.C_scaffold_18000022 [Trichoderma reesei]	48.67	Pisatin demethylase-like	CYP609	CYP60A5	Aspergillus oryzae	0.6242	1e-179
4663.t1	related to cytochrome P450 monooxygenase (lovA)	[ P450_Fs048 ] e_gw1.14.510.1 [Fusarium solani f. batatas]	80.46	e-class P450, group I	CYP602	CYP5027A1	Ustilago maydis 521	0.4212	1e-115
480.t1	putative efflux pump antibiotic resistance protein	[ P450_Pa074 ] Pa_7_5740 [Podospora anserina]	26.28	E-class P450, group IV		CYP5014F1	Phytophthora ramorum	0.2598	3e-35
4817.t1	Choline monooxygenase, chloroplastic	No matches
4835.t1	cytochrome P450	[ P450_Fs039 ] e_gw1.22.190.1 [Fusarium solani f. batatas]	33.8		CYP630	CYP55A6	Neurospora crassa	0.3712	7e-72
4840.t1	related to pisatin demethylase (cytochrome P450)	No matches
4855.t1	O-methylsterigmatocystin oxidoreductase	[ P450_Tr050 ] fgenesh5_pg.C_scaffold_17000141 [Trichoderma reesei]	67.99	Pisatin demethylase-like	CYP621	CYP60B1	Aspergillus nidulans	0.7694	0
5018.t1	hypothetical protein TRIVIDRAFT_71044	No matches
5178.t1	related to NCP1-NADPH-cytochrome P450 reductase	[ P450_Ba073 ] gm1.7036_g [Bjerkandera adusta]	36.36	e-class P450, group I	CYP505	CYP547C1	Aspergillus nidulans	0.2428	2e-25
5200.t1	cytochrome P450 8B1	[ P450_Fs020 ] e_gw1.31.239.1 [Fusarium solani f. batatas]	62.11	P450, CYP52	CYP634	CYP584D1	Fusarium graminearum	0.5436	1e-158
5209.t1	cytochrome P450	[ P450_Ate006 ] ATEG_00738.1 [Aspergillus terreus]	67.88	e-class P450, group I	CYP680	CYP680A1	Aspergillus nidulans	0.2926	4e-50
5384.t1	Tryprostatin B 6-hydroxylase	[ P450_Vdm021 ] VDBG_03058 [Verticillium albo-atrum VaMs. 102]	55.13	e-class P450, group I	CYP628	CYP504A4	Magnaporthe grisea	0.9691	0
55.t1	cytochrome P450	[ P450_Fs021 ] e_gw1.60.34.1 [Fusarium solani f. batatas]	76.61	e-class P450, group I	CYP505	CYP528A2	Fusarium graminearum	0.5542	1e-73
5553.t1	cytochrome P450	[ P450_AnA127 ] e_gw1.6.1239.1 [Aspergillus niger ATCC 1015]	41.61		CYP68	CYP5089A1c	Aspergillus fumigatus	1	0
5563.t1	cytochrome P450	[ P450_Tr062 ] fgenesh1_pm.C_scaffold_29000033 [Trichoderma reesei]	54.93		CYP65	CYP52H3	Aspergillus oryzae	0.5164	1e-121
5761.t1	related to cytochrome p450	[ P450_Fs009 ] e_gw1.18.1867.1 [Fusarium solani f. batatas]	69.53	e-class P450, group I	CYP621	CYP548A3	Fusarium graminearum	0.7609	0
5926.t1	benzoate 4-monooxygenase cytochrome P450	[ P450_Nf056 ] NFIA_099450 [Neosartorya fischeri]	48.91	e-class P450, group I	CYP630	CYP530A3	Aspergillus nidulans	0.2888	1e-42
593.t1	related to benzoate 4-monooxygenase cytochrome P450	[ P450_Fs092 ] fgenesh1_pm.sca_18_chr2_1_0000195 [Fusarium solani f. batatas]	58.35	e-class P450, group I	CYP616	CYP504B5b	Aspergillus fumigatus	0.2374	3e-38
6058.t1	Cytochrome P450 61	[ P450_Fs088 ] estExt_Genewise1Plus.C_sca_82_chr10_2_00600 [Fusarium solani f. batatas]	77.5	E-class P450, group IV	CYP61	CYP539B1	Magnaporthe grisea	0.2573	1e-26
6156.t1	related to benzoate 4-monooxygenase cytochrome P450	[ P450_Fo063 ] FOXG_09731 [Fusarium oxysporum]	65.02	e-class P450, group I	CYP537	CYP5144C4	Phanerochaete chrysosporium	0.2312	7e-30
6506.t1	related to pisatin demethylase (cytochrome P450)	[ P450_Fv005 ] FVEG_00415 [Fusarium verticillioides]	76.2		CYP570	CYP530A2	Fusarium graminearum	0.3959	8e-37
6571.t1	Cytochrome P450 4F12	[ P450_Fo094 ] FOXG_12223 [Fusarium oxysporum]	82.93	e-class P450, group I	CYP615	CYP617D3b	Aspergillus fumigatus	0.2808	6e-39
673.t1	benzoate 4-monooxygenase cytochrome P450	[ P450_Fs127 ] fgenesh1_pg.sca_6_chr9_2_0000613 [Fusarium solani f. batatas]	74.16	e-class P450, group I	CYP680	CYP504B5b	Aspergillus fumigatus	0.2725	1e-47
6988.t1	cytochrome P450 oxidoreductase	No matches
7024.t1	Bifunctional P-450:NADPH-P450 reductase	[ P450_Fs129 ] fgenesh1_pg.sca_82_chr10_2_0000349 [Fusarium solani f. batatas]	74.2	e-class P450, group I	CYP505	CYP5069A1c	Aspergillus fumigatus	0.3562	3e-24
7057.t1	cytochrome P450	[ P450_Ate079 ] ATEG_07093.1 [Aspergillus terreus]	54.05	e-class P450, group I	CYP65	CYP65AF1	Aspergillus oryzae	0.4247	1e-100
7144.t1	Alcohol oxidase 1	No matches
7194.t1	cytochrome P450 monooxygenase	[ P450_Ta040 ] 79290 [Trichoderma atroviride]	61.98		CYP526	CYP5139A1	Phanerochaete chrysosporium	0.4314	1e-105
75.t1	O-methylsterigmatocystin oxidoreductase	[ P450_Fs038 ] e_gw1.22.33.1 [Fusarium solani f. batatas]	65.46	e-class P450, group I	CYP620	CYP504A4	Magnaporthe grisea	0.798	0
8187.t1	Eburicol 14-alpha-demethylase	[ P450_Fs085 ] estExt_Genewise1.C_sca_1_chr1_3_00465 [Fusarium solani f. batatas]	88.04	E-class P450, group IV	CYP51	CYP61A1	Aspergillus oryzae	0.5188	1e-140
8245.t1	related to isotrichodermin C-15 hydroxylase (cytochrome P-450 monooxygenase CYP65A1)	[ P450_Fs156 ] estExt_fgenesh1_pg.C_sca_1_chr1_3_00312 [Fusarium solani f. batatas]	73.3		CYP617	CYP618A1	Fusarium graminearum	0.4921	1e-138
8348.t1	3-hydroxyphenylacetate 6-hydroxylase	[ P450_048 ] CH063_02473T0 [Colletotrichum higginsianum]	75.42	e-class P450, group I	CYP504	CYP540B1	Magnaporthe grisea	0.2643	1e-20
8384.t1	Cytochrome P450 monooxygenase lolP1	[ P450_Fs160 ] estExt_fgenesh1_pm.C_sca_1_chr1_3_00670 [Fusarium solani f. batatas]	73.87	e-class P450, group I	CYP535	CYP61A1	Fusarium graminearum	0.7989	0
842.t1	cytochrome P450 18a1-like isoform X2	no matches
843.t1	cytochrome P450	[ P450_Fs090 ] fgenesh1_pm.sca_8_chr1_1_0000007 [Fusarium solani f. batatas]	69.59		CYP5078	CYP5147C1	Phanerochaete chrysosporium	0.3706	7e-23
8564.t1	probable benzoate 4-monooxygenase cytochrome P450	[ P450_Fs162 ] estExt_fgenesh1_pm.C_sca_10_chr8_2_00253 [Fusarium solani f. batatas]	78.09	e-class P450, group I	CYP537	CYP530A3	Aspergillus nidulans	0.3964	3e-97
860.t1	thiamine pyrophosphate enzyme	no matches
9050.t1	cytochrome P450	[ P450_Tvg054 ] e_gw1.14.457.1 [Trichoderma virens Gv29-8]	54.52	Pisatin demethylase-like	CYP65	CYP5150A4	Phanerochaete chrysosporium	0.5072	1e-145
926.t1	Pisatin demethylase	[ P450_Vdm054 ] VDBG_07329 [Verticillium albo-atrum VaMs. 102]	65.88	e-class P450, group I	CYP573	CYP533B1	Magnaporthe grisea	0.9225	0
9350.t1	Cell division control protein 42	no matches
9439.t1	cytochrome P450, family 51 (sterol 14-demethylase)	[ P450_Fs030 ] e_gw1.20.745.1 [Fusarium solani f. batatas]	78.04		CYP51	CYP505A7	Fusarium graminearum	0.6721	0
9446.t1	3-hydroxyphenylacetate 6-hydroxylase	[ P450_Fo051 ] FOXG_07489 [Fusarium oxysporum]	78.76	e-class P450, group I	CYP504	CYP530A3	Aspergillus nidulans	0.2593	3e-30
9585.t1	cytochrome P450 oxidoreductase	[ P450_Fs015 ] e_gw1.2.810.1 [Fusarium solani f. batatas]	81.03	P450, CYP52	CYP630	CYP539B1	Magnaporthe grisea	0.4868	1e-128
9620.t1	benzoate 4-monooxygenase cytochrome P450	[ P450_Fs093 ] fgenesh1_pm.sca_18_chr2_1_0000256 [Fusarium solani f. batatas]	67.01	Pisatin demethylase-like	CYP65	CYP5014B1	Phytophthora sojae	0.4698	6e-33
9722.t1	cytochrome P450	[ P450_Ts126 ] TSTA_105720 [Talaromyces stipitatus]	60.93	E-class P450, group IV	CYP68	CYP653B1	Aspergillus oryzae	0.9363	0
9763.t1	cytochrome P450	[ P450_125 ] CH063_07685T0 [Colletotrichum higginsianum]	74.34	e-class P450, group I	CYP541	CYP5015E7	Phytophthora sojae	0.2483	3e-32
9784.t1	cytochrome p450 7b1	[ P450_Fs096 ] fgenesh1_pm.sca_12_chr5_2_0000075 [Fusarium solani f. batatas]	53		CYP641	CYP5136A3	Phanerochaete chrysosporium	0.2916	3e-41
9927.t1	related to cytochrome P450	[ P450_Fg053 ] FGSG_05334.3 [Fusarium graminearum]	61.95	E-class P450, group IV	CYP559	CYP611A1	Magnaporthe grisea	0.3163	8e-55

## Sheet: CBS22631 145seq
Supplementary Table 3. Summary of cytochrome oxydases (CYP) found in the predicted proteome of Nectriaceous fungi						Best hit of Nelson's
AA SeqName	Description (Based on BlastP best hit)	Name of hit [ on Fungal Cytochrome P450 Database]	Identity [%]	P450 Class Name	putative CPY name	Nelson's P450 Name	Species name	Identity	E-value
g64.t1	Cytochrome P450 3A9	[ P450_Mg004 ] fgenesh223 [Magnaporthe oryzae 70-15]	70.68	E-class P450, group I	CYP576	CYP576A1	Magnaporthe grisea	0.9358	0
g69.t1	cytochrome P450	[ P450_Ptr082 ] PTRG_10136 [Pyrenophora tritici-repentis]	32.57	E-class P450, group I	CYP534	CYP584E3b	Aspergillus fumigatus	0.2443	8e-23
g73.t1	cytochrome P450	[ P450_Tr010 ] e_gw1.3.723.1 [Trichoderma reesei]	33.45	E-class P450, group IV	CYP503	CYP526B1	Neurospora crassa	0.7619	0
g75.t1	cytochrome P450	[ P450_AnC150 ] An18g02700 [Aspergillus niger CBS 513.88]	37.5		CYP503	CYP52H3	Aspergillus oryzae	0.4623	1e-118
g97.t1	cytochrome P450 8B1	[ P450_Fs020 ] e_gw1.31.239.1 [Fusarium solani f. batatas]	62.11	P450, CYP52	CYP634	CYP584D1	Fusarium graminearum	0.5436	1e-158
g9988.t1	copper amine oxidase	No matches
g10254.t1	putative acetylxylan esterase A	No matches
g10417.t1	probable cytochrome P450 monooxygenase (lovA)	[ P450_164 ] CH063_10073T0 [Colletotrichum higginsianum]	60.15		CYP68	CYP547B1	Fusarium graminearum	0.2775	2e-36
g10423.t1	Eburicol 14-alpha-demethylase	[ P450_Fs030 ] e_gw1.20.745.1 [Fusarium solani f. batatas]	78.31		CYP51	CYP505A7	Fusarium graminearum	0.6721	0
g10429.t1	3-hydroxyphenylacetate 6-hydroxylase	[ P450_Fo051 ] FOXG_07489 [Fusarium oxysporum]	80.69	E-class P450, group I	CYP504	CYP530A3	Aspergillus nidulans	0.2593	3e-30
g1021.t1	cytochrome P450 monooxygenase	[ P450_Ta040 ] 79290 [Trichoderma atroviride]	59.71		CYP526	CYP5139A1	Phanerochaete chrysosporium	0.4314	1e-105
g10462.t1	cytochrome P450	No matches
g10601.t1	related to pisatin demethylase cytochrome P450	[ P450_Vdm021 ] VDBG_03058 [Verticillium albo-atrum VaMs. 102]	63.17	E-class P450, group I	CYP628	CYP504A4	Magnaporthe grisea	0.9691	0
g10775.t1	O-methylsterigmatocystin oxidoreductase	[ P450_Fo085 ] FOXG_11744 [Fusarium oxysporum]	66.05	E-class P450, group I	CYP620	CYP5157A1	Phanerochaete chrysosporium	0.3401	1e-37
g11414.t1	related to choline monooxygenase	No matches
g11585.t1	Bifunctional P-450:NADPH-P450 reductase	[ P450_Fs129 ] fgenesh1_pg.sca_82_chr10_2_0000349 [Fusarium solani f. batatas]	74.08	E-class P450, group I	CYP505	CYP5069A1c	Aspergillus fumigatus	0.3562	3e-24
g11592.t1	Cytochrome P450 4B1	No matches
g11648.t1	fatty acid hydroxylase	[ P450_Mc040 ] MCYG_04850 [Microsporum canis]	55.99		CYP505	CYP68D1	Neurospora crassa	0.4981	1e-140
g11653.t1	Cytochrome P450 monooygenase	[ P450_Ss054 ] SS1G_08677.1 [Sclerotinia sclerotiorum]	47.05	E-class P450, group IV	CYP5085	CYP5085A1b	Aspergillus fumigatus	0.3256	2e-67
g11656.t1	cytochrome P450 monooxygenase	[ P450_Cir2022 ] CIRG_04216 [Coccidioides immitis RMSCC2394]	45.35	P450, CYP52	CYP584	CYP641A1	Fusarium graminearum	0.3868	1e-128
g11723.t1	benzoate 4-monooxygenase cytochrome p450	[ P450_Cp116 ] fgenesh1_pg.C_scaffold_6000667 [Cryphonectria parasitica]	50.58	E-class P450, group I	CYP62	CYP5014D3	Phytophthora sojae	0.3658	1e-80
g11899.t1	cytochrome P450 oxidoreductase	[ P450_Fs031 ] e_gw1.20.1275.1 [Fusarium solani f. batatas]	65.06	Pisatin demethilase-like	CYP5080	CYP51F1	Fusarium graminearum	0.7947	0
g11917.t1	cytochrome p450	[ P450_116 ] CH063_06941T0 [Colletotrichum higginsianum]	52.71		CYP5061	CYP63A4	Phanerochaete chrysosporium	0.2653	7e-24
g11923.t1	Alcohol oxidase 1	No matches
g11926.t1	related to cytochrome P450 monooxygenase (lovA)	[ P450_Fs048 ] e_gw1.14.510.1 [Fusarium solani f. batatas]	75.13	E-class P450, group I	CYP602	CYP5027A1	Ustilago maydis 521	0.4212	1e-115
g12324.t1	related to benzoate 4-monooxygenase cytochrome P450	[ P450_Fs161 ] estExt_fgenesh1_pm.C_sca_3_chr4_2_00228 [Fusarium solani f. batatas]	80.25	Pisatin demethilase-like	CYP548	CYP617A1	Fusarium graminearum	0.6382	0
g12339.t1	cytochrome p450 benzoate 4-monooxygenase	[ P450_Pm008 ] EEA27553.1 [Penicillium marneffei]	72.58	Pisatin demethilase-like	CYP53	CYP5015C1	Phytophthora sojae	0.2524	7e-34
g12348.t1	Benzoate 4-monooxygenase	[ P450_Fg112 ] FGSG_13445.3 [Fusarium graminearum]	77.6	Pisatin demethilase-like	CYP53	CYP53A12b	Aspergillus fumigatus	0.648	0
g12522.t1	Choline monooxygenase, chloroplastic	No matches
g12591.t1	cytochrome P450	[ P450_Tvg004 ] e_gw1.20.371.1 [Trichoderma virens Gv29-8]	68	P450, CYP52	CYP655	CYP682D1	Aspergillus nidulans	0.5169	2e-25
g13299.t1	benzoate 4-monooxygenase cytochrome P450	[ P450_Fs127 ] fgenesh1_pg.sca_6_chr9_2_0000613 [Fusarium solani f. batatas]	72.03	E-class P450, group I	CYP680	CYP504B5b	Aspergillus fumigatus	0.2725	1e-47
g13333.t1	related to n-alkane-inducible cytochrome P450	[ P450_Fs018 ] e_gw1.2.182.1 [Fusarium solani f. batatas]	74.6	P450, CYP52	CYP584	CYP539A3	Fusarium graminearum	0.5557	0
g13350.t1	related to cytochrome p450	[ P450_Fs009 ] e_gw1.18.1867.1 [Fusarium solani f. batatas]	69.1	E-class P450, group I	CYP621	CYP548A3	Fusarium graminearum	0.7609	0
g13383.t1	cytochrome p450 oxidoreductase	[ P450_Fs016 ] e_gw1.2.1471.1 [Fusarium solani f. batatas]	80.44	E-class P450, group I	CYP544	CYP5144E1	Phanerochaete chrysosporium	0.6509	4e-38
g1304.t1	cytochrome P450	[ P450_Tvg054 ] e_gw1.14.457.1 [Trichoderma virens Gv29-8]	68.46	Pisatin demethilase-like	CYP65	CYP5150A4	Phanerochaete chrysosporium	0.5072	1e-145
g1467.t1	related to benzoate 4-monooxygenase cytochrome P450	[ P450_Fo063 ] FOXG_09731 [Fusarium oxysporum]	62.7	E-class P450, group I	CYP537	CYP5144C4	Phanerochaete chrysosporium	0.2312	7e-30
g1498.t1	cytochrome P450	[ P450_Fg099 ] FGSG_11536.3 [Fusarium graminearum]	49.07	E-class P450, group IV	CYP54	CYP552C2	Fusarium graminearum	0.6902	0
g1499.t1	O-methyltransferase, putative	No matches
g1500.t1	cytochrome P450	[ P450_214 ] CH063_14433T0 [Colletotrichum higginsianum]	47.8	Pisatin demethilase-like	CYP65	CYP617A1	Fusarium graminearum	0.2575	4e-33
g1502.t1	ent-kaurene oxidase	[ P450_Cp115 ] estExt_fgenesh1_pm.C_60459 [Cryphonectria parasitica]	52.4		CYP606	CYP63A3	Phanerochaete chrysosporium	0.2312	5e-23
g1504.t1	cytochrome P450	[ P450_Cp107 ] fgenesh1_pg.C_scaffold_16000117 [Cryphonectria parasitica]	52.09		CYP639	CYP505C2	Fusarium graminearum	0.2744	4e-31
g1505.t1	cytochrome P450	[ P450_Cp108 ] e_gw1.16.51.1 [Cryphonectria parasitica]	63.38	Pisatin demethilase-like	CYP567	CYP5014D2 P	Phytophthora sojae	0.2333	2e-22
g1507.t1	cytochrome P450	[ P450_Cp109 ] gw1.16.31.1 [Cryphonectria parasitica]	42.02	E-class P450, group I	CYP667	CYP5014J1	Phytophthora sojae	0.2462	7e-25
g1511.t1	fusarin c cluster-cytochrome p450	[ P450_Fs033 ] e_gw1.9.336.1 [Fusarium solani f. batatas]	55.74	E-class P450, group I	CYP627	CYP5136A1	Phanerochaete chrysosporium	0.2378	8e-34
g1515.t1	cytochrome P450 monooxygenase	[ P450_Cg071 ] GLRG_08829T0 [Colletotrichum graminicola M1.001]	60.19	E-class P450, CYP2A	CYP578	CYP5144A7	Phanerochaete chrysosporium	0.2692	2e-27
g1915.t1	cytochrome p450	[ P450_Mgr024 ] estExt_Genewise.C_13466 [Mycosphaerella graminicola]	38.41	Pisatin demethilase-like	CYP5078	CYP530A5c	Aspergillus fumigatus	0.3619	3e-36
g1926.t1	related to O-methylsterigmatocystin oxidoreductase	[ P450_Fs007 ] e_gw1.1.1600.1 [Fusarium solani f. batatas]	84.76		CYP5065	CYP548A1	Neurospora crassa	0.3924	2e-93
g1935.t1	Isotrichodermin C-15 hydroxylase	[ P450_Cp099 ] fgenesh1_pm.C_scaffold_4000688 [Cryphonectria parasitica]	51.12	Pisatin demethilase-like	CYP65	CYP5014B1	Phytophthora ramorum	0.2889	2e-36
g183.t1	cytochrome P450	[ P450_125 ] CH063_07685T0 [Colletotrichum higginsianum]	70.61	E-class P450, group I	CYP541	CYP5015E7	Phytophthora sojae	0.2483	3e-32
g2080.t1	cytochrome P450	[ P450_Ptr016 ] PTRG_02979 [Pyrenophora tritici-repentis]	47.67	E-class P450, CYP3A	CYP531	CYP5032A1	Ustilago maydis 521	0.2527	2e-36
g2183.t1	cytochrome P450 oxidoreductase	[ P450_Fo153 ] FOXG_16987 [Fusarium oxysporum]	82.54		CYP540	CYP5015G4	Phytophthora sojae	0.2514	9e-27
g2235.t1	averantin oxidoreductase	[ P450_Vd042 ] VDAG_06706 [Verticillium dahliae VdLs. 17]	75.63	Pisatin demethilase-like	CYP65	CYP5014G1	Phytophthora sojae	0.8504	1e-177
g2314.t1	putative cytochrome P450 oxidoreductase	[ P450_Nf082 ] NFIA_047320 [Neosartorya fischeri]	39.34	E-class P450, CYP3A	CYP619	CYP665A1	Aspergillus nidulans	0.2638	1e-41
g2333.t1	cytochrome p450	[ P450_Tvg013 ] e_gw1.10.142.1 [Trichoderma virens Gv29-8]	69.53	E-class P450, group I	CYP621	CYP53C2	Phanerochaete chrysosporium	0.3311	2e-54
g2409.t1	Cytochrome p450	[ P450_069 ] CLME206373.M [Cladonia metacorallifera]	60.94	Pisatin demethilase-like	CYP65	CYP539A1	Neurospora crassa	0.2509	6e-31
g2492.t1	O-methylsterigmatocystin oxidoreductase	[ P450_Fs038 ] e_gw1.22.33.1 [Fusarium solani f. batatas]	66.41	E-class P450, group I	CYP620	CYP530A3	Aspergillus nidulans	0.2526	5e-31
g2639.t1	cytochrome P450	[ P450_Fg065 ] FGSG_08079.3 [Fusarium graminearum]	71.25	Pisatin demethilase-like	CYP53	CYP590A1	Magnaporthe grisea	0.2661	2e-51
g2650.t1	flavonoid 3',5'-hydroxylase	[ P450_Vdm054 ] VDBG_07329 [Verticillium albo-atrum VaMs. 102]	65.13	E-class P450, group I	CYP573	CYP533B1	Magnaporthe grisea	0.9225	0
g2669.t1	NADPH--cytochrome P450 reductase	[ P450_Ch056 ] estExt_Genewise1Plus.C_60940 [Cochliobolus heterostrophus]	29.14	E-class P450, group I	CYP505	CYP547B1	Fusarium graminearum	0.2687	9e-38
g2671.t1	cytochrome P450 oxidoreductase	[ P450_Fs022 ] e_gw1.61.48.1 [Fusarium solani f. batatas]	79.58		CYP630	CYP559B1	Magnaporthe grisea	0.4742	1e-131
g2814.t1	major facilitator superfamily domain-containing protein	[ P450_Ate057 ] ATEG_04721.1 [Aspergillus terreus]	26.06	E-class P450, group I	CYP570	CYP570A1	Magnaporthe grisea	0.4081	9e-96
g2890.t1	metallo-beta-lactamase superfamily protein	No matches
g2896.t1	gibberellin cluster-GA14-synthase	[ P450_Hc4001 ] HCDG_01175 [Histoplasma capsulatum H143]	49.5		CYP68	CYP630B10b	Aspergillus fumigatus	1	0
g2897.t1	Ent-kaurene oxidase	[ P450_AnA115 ] e_gw1.4.275.1 [Aspergillus niger ATCC 1015]	57.59		CYP503	CYP617D3b	Aspergillus fumigatus	1	0
g269.t1	Steroid 17-alpha-hydroxylase/17,20 lyase	[ P450_Pb085 ] PADG_01302 [Paracoccidioides brasiliensis]	37.98	Pisatin demethilase-like	CYP665	CYP563B1	Magnaporthe grisea	0.9153	0
g3035.t1	cytochrome P450	[ P450_Fs045 ] e_gw1.82.577.1 [Fusarium solani f. batatas]	55.78	E-class P450, group IV	CYP623	CYP5037B3	Phanerochaete chrysosporium	0.5531	1e-149
g3040.t1	cytochrome P450	[ P450_Cg122 ] GLRG_11404T0 [Colletotrichum graminicola M1.001]	57.66	E-class P450, group I	CYP62	CYP5070A1	Aspergillus oryzae	0.2423	1e-33
g3069.t1	beta-lactamase-like protein	No matches
g3103.t1	related to pisatin demethylase cytochrome P450	[ P450_Cpc7006 ] CPC735_069560 [Coccidioides posadasii C735]	43.69	Pisatin demethilase-like	CYP5080	CYP65K1	Magnaporthe grisea	0.8457	0
g3107.t1	cytochrome P450	[ P450_Cg077 ] GLRG_09425T0 [Colletotrichum graminicola M1.001]	42.39	E-class P450, CYP2J	CYP526	CYP5037B3	Phanerochaete chrysosporium	0.3864	4e-96
g3115.t1	cytochrome P450	[ P450_PCR077 ] CAP97144.1 [Penicillium chrysogenum]	48.71		CYP5052	CYP5015A1	Phytophthora ramorum	0.256	5e-33
g3121.t1	benzoate 4-monooxygenase cytochrome P450, putative	[ P450_Ts063 ] TSTA_036600 [Talaromyces stipitatus]	75.88	E-class P450, group IV	CYP577	CYP5110A1	Aspergillus oryzae	0.8986	1e-142
g3125.t1	Phenylacetate 2-hydroxylase	[ P450_Fs072 ] e_gw1.47.62.1 [Fusarium solani f. batatas]	84	E-class P450, group I	CYP504	CYP616A1	Fusarium graminearum	0.2517	6e-28
g3126.t1	NAD(P)-binding protein	[ P450_AnA152 ] gw1.9.669.1 [Aspergillus niger ATCC 1015]	62.65	E-class P450, group I	CYP504	CYP5052C1a	Aspergillus fumigatus	0.4081	7e-88
g3194.t1	cytochrome P450	[ P450_Ta019 ] 30243 [Trichoderma atroviride]	54.31	Pisatin demethilase-like	CYP65	CYP5014D1	Phytophthora sojae	0.3245	3e-61
g3230.t1	cytochrome P450 oxidoreductase	No matches
g3516.t1	NADPH-cytochrome P450 reductase	[ P450_Pc002 ] e_gwh2.7.20.1 [Phanerochaete chrysosporium]	28.73	E-class P450, group I	CYP505	CYP5053C1	Aspergillus oryzae	0.6633	0
g3599.t1	probable benzoate 4-monooxygenase cytochrome P450	[ P450_Fs162 ] estExt_fgenesh1_pm.C_sca_10_chr8_2_00253 [Fusarium solani f. batatas]	77.56	E-class P450, group I	CYP537	CYP530A3	Aspergillus nidulans	0.3964	3e-97
g3718.t1	probable cycloheximide-inducible protein CIP70 (cytochrome P450 family)	[ P450_Fs114 ] fgenesh1_pg.sca_26_chr2_2_0000090 [Fusarium solani f. batatas]	70.17	E-class P450, group IV	CYP54	CYP51F1	Ustilago maydis 521	0.5444	1e-145
g3767.t1	cytochrome P450	[ P450_Ate079 ] ATEG_07093.1 [Aspergillus terreus]	54.067	E-class P450, group I	CYP65	CYP65AF1	Aspergillus oryzae	0.4247	1e-100
g3805.t1	O-methylsterigmatocystin oxidoreductase	[ P450_Fs065 ] e_gw1.29.28.1 [Fusarium solani f. batatas]	72.6	E-class P450, group I	CYP620	CYP58D2	Aspergillus oryzae	0.95	0
g4023.t1	Cytochrome P450 momooxygenase	[ P450_Fs001 ] gw1.27.66.1 [Fusarium solani f. batatas]	65.83	Pisatin demethilase-like	CYP675	CYP561D1	Fusarium graminearum	0.4635	1e-137
g4072.t1	cytochrome P450	no matches
g4097.t1	Cytochrome P450 61	[ P450_Tvg003 ] estExt_fgenesh1_pg.C_190151 [Trichoderma virens Gv29-8]	82.52	E-class P450, group I	CYP619	CYP5037B3	Phanerochaete chrysosporium	0.3822	1e-100
g4374.t1	cytochrome P450	[ P450_Fs021 ] e_gw1.60.34.1 [Fusarium solani f. batatas]	77.08	E-class P450, group I	CYP505	CYP528A2	Magnaporthe grisea	0.5519	1e-73
g418.t1	cupin -type protein	[ P450_Tt018 ] estExt_fgenesh2_pm.C_21000 [Thielavia terrestris]	51.33	E-class P450, group I	CYP534	CYP590A1	Magnaporthe grisea	1	0
g419.t1	cytochrome p450	[ P450_Fs024 ] e_gw1.5.1131.1 [Fusarium solani f. batatas]	69.29	E-class P450, group I	CYP534	CYP528A2	Magnaporthe grisea	0.5683	1e-137
g4618.t1	related to isotrichodermin C-15 hydroxylase (cytochrome P-450 monooxygenase CYP65A1)	[ P450_Fs156 ] estExt_fgenesh1_pg.C_sca_1_chr1_3_00312 [Fusarium solani f. batatas]	75.68		CYP617	CYP618A1	Fusarium graminearum	0.4921	1e-138
g4800.t1	related to pisatin demethylase cytochrome P450	[ P450_Mgr057 ] e_gw.10.630.1 [Mycosphaerella graminicola]	47.11	Pisatin demethilase-like	CYP5078	CYP5078A3	Aspergillus nidulans	0.3918	6e-97
g5003.t1	Aconitase/3-isopropylmalate dehydratase large subunit, alpha/beta/alpha, subdomain 1/3	No matches
g5049.t1	O-methylsterigmatocystin oxidoreductase	[ P450_Fs065 ] e_gw1.29.28.1 [Fusarium solani f. batatas]	62.19	E-class P450, group I	CYP620	CYP58D2	Aspergillus oryzae	0.95	0
g5135.t1	cytochrome p450 3a13	[ P450_Fs012 ] e_gw1.71.63.1 [Fusarium solani f. batatas]	75.22	E-class P450, group I	CYP547	CYP534C1	Fusarium graminearum	0.2948	9e-65
g5153.t1	Cytochrome P450	[ P450_Afl066 ] AFL2G_05913 [Aspergillus flavus]	33.85		CYP630	CYP55A6	Neurospora crassa	0.3712	7e-72
g5219.t1	cytochrome P450	[ P450_Ate006 ] ATEG_00738.1 [Aspergillus terreus]	69.67	E-class P450, group I	CYP680	CYP680A1	Aspergillus nidulans	0.2926	4e-50
g5274.t1	cytochrome protein	[ P450_Fs090 ] fgenesh1_pm.sca_8_chr1_1_0000007 [Fusarium solani f. batatas]	75.33		CYP5078	CYP5147C1	Phanerochaete chrysosporium	0.3706	7e-23
g5275.t1	cytochrome P450	[ P450_Fs090 ] fgenesh1_pm.sca_8_chr1_1_0000007 [Fusarium solani f. batatas]	77.1		CYP5078	CYP5147C1	Phanerochaete chrysosporium	0.3706	7e-23
g5294.t1	thiamine pyrophosphate enzyme	no matches
g5376.t1	exopolygalacturonase	no matches
g509.t1	cytochrome P450	[ P450_Ta028 ] 90902 [Trichoderma atroviride]	41.22	E-class P450, group I	CYP574	CYP675A1	Aspergillus nidulans	0.3622	1e-93
g5657.t1	cytochrome P450	[ P450_AnA127 ] e_gw1.6.1239.1 [Aspergillus niger ATCC 1015]	42.65		CYP68	CYP5089A1c	Aspergillus fumigatus	1	0
g5664.t1	cytochrome P450	[ P450_PCR077 ] CAP97144.1 [Penicillium chrysogenum]	47.86		CYP5052	CYP5015A1	Phytophthora ramorum	0.256	5e-33
g5721.t1	pisatin demethylase	[ P450_Fs055 ] e_gw1.32.144.1 [Fusarium solani f. batatas]	78.85	E-class P450, group I	CYP531	CYP5014J1	Phytophthora sojae	0.97	0
g5790.t1	related to n-alkane-inducible cytochrome P450	[ P450_Fs006 ] e_gw1.1.288.1 [Fusarium solani f. batatas]	74.95	E-class P450, CYP52	CYP539	CYP541A1	Neurospora crassa	0.6288	1e-175
g5931.t1	cytochrome p450	[ P450_Fs010 ] e_gw1.26.298.1 [Fusarium solani f. batatas]	59.44	E-class P450, group I	CYP559	CYP570C1	Fusarium graminearum	0.6632	0
g6254.t1	related to pisatin demethylase cytochrome P450	[ P450_Fs107 ] fgenesh1_pm.sca_69_chr11_6_0000015 [Fusarium solani f. batatas]	75.86	Pisatin demethilase-like	CYP532	CYP540B9	Aspergillus oryzae	0.3142	5e-67
g6360.t1	related to cytochrome P450 7B1	[ P450_Fg039 ] FGSG_03498.3 [Fusarium graminearum]	60.74		CYP637	CYP5093A4	Aspergillus oryzae	1	0
g6368.t1	Cytochrome P450 61	[ P450_Ta023 ] 43598 [Trichoderma atroviride]	79.02	E-class P450, group I	CYP61	CYP51F1	Fusarium graminearum	0.2418	6e-28
g6400.t1	Cytochrome P450 55A3	[ P450_Fs027 ] e_gw1.33.219.1 [Fusarium solani f. batatas]	76.19		CYP55	CYP5090A1b	Aspergillus fumigatus	0.6222	1e-163
g6429.t1	O-methylsterigmatocystin oxidoreductase	[ P450_Fo085 ] FOXG_11744 [Fusarium oxysporum]	62.72	E-class P450, group I	CYP620	CYP5157A1	Phanerochaete chrysosporium	0.3401	1e-37
g6571.t1	related to pisatin demethylase cytochrome P450	[ P450_Fs005 ] e_gw1.8.73.1 [Fusarium solani f. batatas]	77.16		CYP532	CYP5093A1	Aspergillus oryzae	0.3581	4e-36
g6684.t1	LysM domain-containing protein	No matches
g6711.t1	related to trichodiene oxygenase cytochrome P450	[ P450_Fo019 ] FOXG_03513 [Fusarium oxysporum]	78.45	E-class P450, group I	CYP580	CYP547C3	Aspergillus oryzae	0.2751	1e-30
g6790.t1	cytochrome P450	[ P450_Fs017 ] e_gw1.2.838.1 [Fusarium solani f. batatas]	75.95	P450, CYP52	CYP538	CYP633A1	Fusarium graminearum	0.2976	5e-66
g6800.t1	cytochrome P450	[ P450_Cir3005 ] CISG_01383 [Coccidioides immitis RMSCC3703]	47.73	Pisatin demethilase-like	CYP5080	CYP548A2	Magnaporthe grisea	0.4678	1e-137
g6801.t1	cytochrome P450	[ P450_Fs109 ] fgenesh1_pm.sca_85_chr13_3_0000003 [Fusarium solani f. batatas]	64.88	Pisatin demethilase-like	CYP62	CYP512F1	Phanerochaete chrysosporium	0.2559	3e-28
g6929.t1	cytochrome P450 4F8	[ P450_AnA015 ] fgenesh1_pg.C_scaffold_10000032 [Aspergillus niger ATCC 1015]	42.88	E-class P450, group IV	CYP5108	CYP5108A1	Aspergillus oryzae	0.5732	1e-160
g6974.t1	related to benzoate 4-monooxygenase cytochrome P450	[ P450_Fs092 ] fgenesh1_pm.sca_18_chr2_1_0000195 [Fusarium solani f. batatas]	63.08	E-class P450, group I	CYP616	CYP504B5b	Aspergillus fumigatus	0.2374	3e-38
g7110.t1	Benzoate 4-monooxygenase	[ P450_Fs047 ] e_gw1.82.588.1 [Fusarium solani f. batatas]	84.47	Pisatin demethilase-like	CYP53	CYP5150A4	Phanerochaete chrysosporium	0.4972	1e-148
g7113.t1	putative cytochrome p450 monooxygenase protein	[ P450_Lm014 ] Lema_T074100.1 [Leptosphaeria maculans]	61.87		CYP583	CYP539D2b	Aspergillus fumigatus	0.2832	2e-30
g7247.t1	Galactose oxidase	No matches
g7371.t1	cytochrome P450 oxidoreductase	No matches
g7428.t1	cytochrome P450	[ P450_Ate051 ] ATEG_04107.1 [Aspergillus terreus]	56.17	Pisatin demethilase-like	CYP532	CYP532A4	Aspergillus nidulans	0.4844	1e-131
g7538.t1	cytochrome p450 7b1	[ P450_Fs096 ] fgenesh1_pm.sca_12_chr5_2_0000075 [Fusarium solani f. batatas]	54.56		CYP641	CYP5136A3	Phanerochaete chrysosporium	0.2916	3e-41
g7627.t1	cytochrome P450 6A1	[ P450_Tr051 ] fgenesh1_pm.C_scaffold_18000022 [Trichoderma reesei]	48.55	Pisatin demethilase-like	CYP609	CYP60A5	Aspergillus oryzae	0.6242	1e-179
g8032.t1	cytochrome P450 oxidoreductase	[ P450_Fo016 ] FOXG_03207 [Fusarium oxysporum]	84.6	E-class P450, group I	CYP630	CYP620H3	Aspergillus oryzae	0.3364	4e-30
g8033.t1	related to NCP1-NADPH-cytochrome P450 reductase	[ P450_Pc002 ] e_gwh2.7.20.1 [Phanerochaete chrysosporium]	30.3	E-class P450, group I	CYP505	CYP5053C1	Aspergillus oryzae	0.6633	0
g8255.t1	Cytochrome P450 monooxygenase mpaDE	No matches
g8256.t1	Cytochrome P450 monooxygenase patI	[ P450_Fs130 ] fgenesh1_pg.sca_14_chr10_3_0000333 [Fusarium solani f. batatas]	71.18	E-class P450, group I	CYP5069	CYP5014D3	Phytophthora sojae	0.2596	1e-24
g8259.t1	Cytochrome P450, E-class, group I	No matches
g8260.t1	cytochrome P450	[ P450_Fs039 ] e_gw1.22.190.1 [Fusarium solani f. batatas]	69.15		CYP630	CYP5151A1	Phanerochaete chrysosporium	0.6371	4e-88
g8265.t1	cytochrome P450	[ P450_Fs131 ] fgenesh1_pg.sca_14_chr10_3_0000338 [Fusarium solani f. batatas]	74.57	E-class P450, group I	CYP530	CYP5145A3	Phanerochaete chrysosporium	0.2597	5e-34
g8332.t1	benzoate 4-monooxygenase cytochrome P450	[ P450_Fs093 ] fgenesh1_pm.sca_18_chr2_1_0000256 [Fusarium solani f. batatas]	68.22	Pisatin demethilase-like	CYP65	CYP5014D3	Phytophthora sojae	0.3776	4e-78
g8707.t1	Cytochrome P450 monooxygenase lolP1	[ P450_Fs160 ] estExt_fgenesh1_pm.C_sca_1_chr1_3_00670 [Fusarium solani f. batatas]	73.61	E-class P450, group I	CYP535	CYP61A1	Fusarium graminearum	0.7989	0
g8752.t1	Squalene monooxygenase	No matches
g8825.t1	cytochrome P450	[ P450_Ta066 ] 83818 [Trichoderma atroviride]	56.16	Pisatin demethilase-like	CYP65	CYP5144C4	Phanerochaete chrysosporium	0.2958	9e-41
g9055.t1	Eburicol 14-alpha-demethylase	[ P450_Fs085 ] estExt_Genewise1.C_sca_1_chr1_3_00465 [Fusarium solani f. batatas]	87.85	E-class P450, group IV	CYP51	CYP61	Ustilago maydis 521	0.504	1e-143
g9122.t1	cytochrome P450	[ P450_Tr064 ] estExt_GeneWisePlus.C_310084 [Trichoderma reesei]	62.53	E-class P450, group IV	CYP559	CYP56C1	Aspergillus oryzae	0.3929	4e-97
g9181.t1	Flap endonuclease	No matches
g9255.t1	cytochrome P450 3A17	[ P450_Tr043 ] fgenesh5_pg.C_scaffold_15000039 [Trichoderma reesei]	45.91	Pisatin demethilase-like	CYP561	CYP629A1	Fusarium graminearum	0.4975	1e-115
g9256.t1	gibberellin cluster-C20-oxidase	[ P450_Cg074 ] GLRG_09074T0 [Colletotrichum graminicola M1.001]	47.68	E-class P450, group IV	CYP68	CYP5037B3	Phanerochaete chrysosporium	0.4127	3e-96
g9431.t1	cytochrome P450	[ P450_Fs110 ] fgenesh1_pm.sca_55_chr13_4_0000011 [Fusarium solani f. batatas]	71.87	E-class P450, group IV	CYP642	CYP665A1	Aspergillus nidulans	0.2902	7e-40
g9534.t1	cytochrome P450 oxidoreductase	[ P450_Fs063 ] e_gw1.29.200.1 [Fusarium solani f. batatas]	74.75	Pisatin demethilase-like	CYP5078	CYP53C1	Ustilago maydis 521	0.5194	1e-139
g9673.t1	related to pisatin demethylase	[ P450_Fs029 ] e_gw1.20.1304.1 [Fusarium solani f. batatas]	79.13	E-class P450, group I	CYP570	CYP621A1	Fusarium graminearum	0.4411	1e-121
g9676.t1	related to pisatin demethylase (cytochrome P450)	[ P450_Fv005 ] FVEG_00415 [Fusarium verticillioides]	67.74	E-class P450, group I	CYP570
g9817.t1	averantin oxidoreductase	[ P450_Mf063 ] e_gw1.18.265.1 [Mycosphaerella fijiensis]	52.54	Pisatin demethilase-like	CYP65	CYP630D2P	Aspergillus oryzae	1	1e-113

## Sheet: CBS125109 98seq
Supplementary Table 3. Summary of cytochrome oxydases (CYP) found in the predicted proteome of Nectriaceous fungi						Best hit of Nelson's
AA SeqName	Description (Based on BlastP best hit)	Name of hit [ on Fungal Cytochrome P450 Database]	Identity [%]	P450 Class Name	Putative CPY name	Nelson's P450 Name	Species name	Identity	E-value
g9921.t1	Pisatin demethylase	[ P450_Fs090 ] fgenesh1_pm.sca_8_chr1_1_0000007 [Fusarium solani f. batatas]	64.14		CYP5078	CYP5147C1	Phanerochaete chrysosporium	0.3706	7e-23
g9928.t1	Pyruvate decarboxylase	[ P450_027 ] CLME202122.M [Cladonia metacorallifera]	24.26		CYP578	CYP5141C1	Phanerochaete chrysosporium	0.2362	2e-25
g9969.t1	related to pisatin demethylase cytochrome P450	[ P450_Ac024 ] estExt_Genewise1Plus.C_30963 [Aspergillus carbonarius]	56.22	E-class P450, group I	CYP628	CYP5037C1	Phanerochaete chrysosporium	0.4437	1e-26
g9988.t1	flavonoid 3',5'-hydroxylase	[ P450_Vdm054 ] VDBG_07329 [Verticillium albo-atrum VaMs. 102]	65.4	E-class P450, group I	CYP573	CYP533B1	Magnaporthe grisea	0.9225	0
g75.t1	25-hydroxycholesterol 7-alpha-hydroxylase	[ P450_Fs020 ] e_gw1.31.239.1 [Fusarium solani f. batatas]	62.89	P450, CYP52	CYP634	CYP584D1	Fusarium graminearum	0.5436	1e-158
g10018.t1	cytochrome P450	[ P450_Fs075 ] e_gw1.28.215.1 [Fusarium solani f. batatas]	71.64		CYP540	CYP505C2	Fusarium graminearum	0.2626	9e-28
g10263.t1	cytochrome P450 oxidoreductase	No matches
g10299.t1	cytochrome P450	[ P450_Tvg017 ] (continued) [Trichoderma virens Gv29-8]	50	E-class P450, group I	CYP505	CYP502B1	Phanerochaete chrysosporium	0.5378	1e-157
g10315.t1	related to pisatin demethylase (cytochrome P450)	[ P450_Fs112 ] fgenesh1_pg.sca_1_chr1_3_0000998 [Fusarium solani f. batatas]	80.5		CYP570	CYP530A2	Fusarium graminearum	0.3959	8e-37
g10453.t1	cytochrome p450 3a17	[ P450_Tr043 ] fgenesh5_pg.C_scaffold_15000039 [Trichoderma reesei]	50.49	Pisatin demethylase-like	CYP561	CYP629A1	Fusarium graminearum	0.4975	1e-115
g10508.t1	cytochrome P450	[ P450_Nf082 ] NFIA_047320 [Neosartorya fischeri]	48.72	E-class P450, CYP3A	CYP619	CYP63A3	Phanerochaete chrysosporium	0.2312	5e-23
g10515.t1	putative cytochrome P450 oxidoreductase	[ P450_Fs104 ] fgenesh1_pm.sca_6_chr9_2_0000413 [Fusarium solani f. batatas]	69.3		CYP619	CYP63A3	Phanerochaete chrysosporium	0.2312	5e-23
g10516.t1	cytochrome P450 oxidoreductase	[ P450_Cp050 ] e_gw1.8.40.1 [Cryphonectria parasitica]	27.5	E-class P450, group I	CYP505	CYP65B2	Magnaporthe grisea	0.329	6e-29
g10622.t1	Pisatin demethylase	[ P450_Fs029 ] e_gw1.20.1304.1 [Fusarium solani f. batatas]	79.73	E-class P450, group I	CYP570	CYP621A1	Fusarium graminearum	0.4411	1e-121
g10754.t1	cytochrome P450 oxidoreductase	No matches
g10882.t1	benzoate 4-monooxygenase cytochrome P450	[ P450_Nf056 ] NFIA_099450 [Neosartorya fischeri]	49.78	E-class P450, group I	CYP630	CYP530A3	Aspergillus nidulans	0.2888	1e-42
g1065.t1	Homoaconitase	No matches
g11025.t1	related to n-alkane-inducible cytochrome P450	[ P450_Fs018 ] e_gw1.2.182.1 [Fusarium solani f. batatas]	67.1	P450, CYP52	CYP584	CYP539A3	Fusarium graminearum	0.5557	0
g1141.t1	cytochrome P450	[ P450_Fs017 ] e_gw1.2.838.1 [Fusarium solani f. batatas]	67.67	P450, CYP52	CYP538	CYP633A1	Fusarium graminearum	0.2976	5e-66
g1423.t1	Eburicol 14-alpha-demethylase	[ P450_Fs085 ] estExt_Genewise1.C_sca_1_chr1_3_00465 [Fusarium solani f. batatas]	86.52	E-class P450, group IV	CYP51	CYP61A1	Aspergillus oryzae	0.5188	1e-140
g43.t1	related to UDPglucose 4-epimerase	No matches
g1478.t1	Cytochrome P450 72A15	[ P450_Fs156 ] estExt_fgenesh1_pg.C_sca_1_chr1_3_00312 [Fusarium solani f. batatas]	73.3		CYP617	CYP618A1	Fusarium graminearum	0.4921	1e-138
g1628.t1	cytochrome P450	No matches
g1711.t1	exopolygalacturonase	No matches
g1770.t1	cytochrome p450 7b1	[ P450_Fs096 ] fgenesh1_pm.sca_12_chr5_2_0000075 [Fusarium solani f. batatas]	55.82		CYP641	CYP5136A3	Phanerochaete chrysosporium	0.2916	3e-41
g1832.t1	cytochrome P450 monooxygenase	[ P450_Ta040 ] 79290 [Trichoderma atroviride]	60.32		CYP526	CYP5139A1	Phanerochaete chrysosporium	0.4314	1e-105
g1921.t1	cytochrome P450 oxidoreductase	[ P450_Fs063 ] e_gw1.29.200.1 [Fusarium solani f. batatas]	71.53	Pisatin demethylase-like	CYP5078	CYP53C1	Ustilago maydis 521	0.5194	1e-139
g142.t1	Cytochrome P450	[ P450_125 ] CH063_07685T0 [Colletotrichum higginsianum]	72.64	E-class P450, group I	CYP541	CYP5015E7	Phytophthora sojae	0.2483	3e-32
g155.t1	cytochrome p450 benzoate 4-monooxygenase	[ P450_Pm008 ] EEA27553.1 [Penicillium marneffei]	74.32	Pisatin demethylase-like	CYP53	CYP5015C1	Phytophthora sojae	0.2524	7e-34
g163.t1	Benzoate 4-monooxygenase	[ P450_Fs014 ] e_gw1.44.98.1 [Fusarium solani f. batatas]	78.58	Pisatin demethylase-like	CYP53	CYP602B1	Fusarium graminearum	0.6853	0
g2117.t1	cytochrome p450 oxidoreductase	[ P450_Fv014 ] FVEG_02317 [Fusarium verticillioides]	56.13		CYP544	CYP51F2	Aspergillus oryzae	0.5269	1e-151
g2648.t1	cytochrome P450	[ P450_Tvg004 ] e_gw1.20.371.1 [Trichoderma virens Gv29-8]	65.61	P450, CYP52	CYP655	CYP682D1	Aspergillus nidulans	0.5169	2e-25
g2798.t1	Cytochrome P450	[ P450_Tr050 ] fgenesh5_pg.C_scaffold_17000141 [Trichoderma reesei]	67.37	Pisatin demethylase-like	CYP621	CYP60B1	Aspergillus nidulans	0.7694	0
g201.t1	Cytochrome P450	[ P450_Ate089 ] ATEG_07797.1 [Aspergillus terreus]	48.56	E-class P450, group I	CYP620	CYP620H3	Aspergillus oryzae	0.7164	0
g202.t1	cytochrome P450	[ P450_Fs038 ] e_gw1.22.33.1 [Fusarium solani f. batatas]	65.59	E-class P450, group I	CYP620	CYP5150A2	Phanerochaete chrysosporium	0.5044	9e-87
g207.t1	CypX, Cytochrome P450	[ P450_Fs001 ] gw1.27.66.1 [Fusarium solani f. batatas]	68.34	Pisatin demethylase-like	CYP675	CYP561D1	Fusarium graminearum	0.4635	1e-137
g3037.t1	high-affinity iron permease-like protein	No matches
g3485.t1	related to cytochrome p450	[ P450_Fs009 ] e_gw1.18.1867.1 [Fusarium solani f. batatas]	73.84	E-class P450, group I	CYP621	CYP548A3	Fusarium graminearum	0.7609	0
g3710.t1	Cytochrome P450 monooxygenase	[ P450_Nf082 ] NFIA_047320 [Neosartorya fischeri]	52.9	E-class P450, CYP3A	CYP619	CYP5069A1c	Aspergillus fumigatus	0.377	3e-26
g3713.t1	cytochrome P450	[ P450_Ch007 ] e_gw1.1.1775.1 [Cochliobolus heterostrophus]	58.56		CYP654	CYP620H3	Aspergillus oryzae	0.3656	5e-26
g3717.t1	benzoate 4-monooxygenase cytochrome P450	[ P450_008 ] CLME201208.M [Cladonia metacorallifera]	51.3	E-class P450, group I	CYP567	CYP547B1	Fusarium graminearum	0.3097	3e-29
g3718.t1	putative cytochrome P450	[ P450_Ao062 ] AO090011000099 [Aspergillus oryzae]	61.34	E-class P450, group I	CYP567	CYP5145A3	Phanerochaete chrysosporium	0.2896	5e-40
g3778.t1	cytochrome p450	[ P450_Tvg013 ] e_gw1.10.142.1 [Trichoderma virens Gv29-8]	68.93	E-class P450, group I	CYP621	CYP53C2	Phanerochaete chrysosporium	0.3311	2e-54
g3996.t1	related to n-alkane-inducible cytochrome P450	[ P450_Fo001 ] FOXG_00101 [Fusarium oxysporum]	74.01		CYP539	CYP5145A1	Phanerochaete chrysosporium	0.2738	2e-39
g342.t1	cupin -type protein	[ P450_Tt018 ] estExt_fgenesh2_pm.C_21000 [Thielavia terrestris]	50.74	E-class P450, group I	CYP534	CYP590A1	Magnaporthe grisea	1	0
g4015.t1	Bifunctional P-450:NADPH-P450 reductase	[ P450_Fs129 ] fgenesh1_pg.sca_82_chr10_2_0000349 [Fusarium solani f. batatas]	72.77	E-class P450, group I	CYP505	CYP5069A1c	Aspergillus fumigatus	0.3562	3e-24
g4264.t1	cytochrome P450	[ P450_Ta028 ] 90902 [Trichoderma atroviride]	44.3	E-class P450, group I	CYP574	CYP620C1	Fusarium graminearum	0.4171	4e-35
g4356.t1	Squalene monooxygenase	No matches
g4397.t1	NADPH-cytochrome P450 reductase	[ P450_Nc012 ] NCU05185T0 [Neurospora crassa]	28.59		CYP505	CYP633A1	Fusarium graminearum	0.257	2e-25
g4448.t1	Cytochrome P450 26A1	No matches
g4689.t1	benzoate 4-monooxygenase cytochrome P450	[ P450_Fs127 ] fgenesh1_pg.sca_6_chr9_2_0000613 [Fusarium solani f. batatas]	72.34	E-class P450, group I	CYP680	CYP504B5b	Aspergillus fumigatus	0.2725	1e-47
g4975.t1	O-methylsterigmatocystin oxidoreductase	[ P450_Fo085 ] FOXG_11744 [Fusarium oxysporum]	65.7	E-class P450, group I	CYP620	CYP5157A1	Phanerochaete chrysosporium	0.3401	1e-37
g4978.t1	benzoate 4-monooxygenase cytochrome P450	[ P450_Ate079 ] ATEG_07093.1 [Aspergillus terreus]	55.68	E-class P450, group I	CYP65	CYP65AF1	Aspergillus oryzae	0.4247	1e-100
g469.t1	cytochrome P450-like protein	[ P450_EF018 ] EfO2.034360.1 [Epichloe festucae]	81.81	Pisatin demethylase-like	CYP548	CYP5015G4	Phytophthora sojae	0.2911	1e-33
g5077.t1	flap structure-specific endonuclease	No matches
g5208.t1	Cytochrome P450 monooxygenase yanC	[ P450_Ta034 ] 32990 [Trichoderma atroviride]	52.17	E-class P450, group I	CYP530	CYP547B1	Fusarium graminearum	0.2916	5e-44
g5220.t1	cytochrome P450 oxidoreductase	[ P450_Fs022 ] e_gw1.61.48.1 [Fusarium solani f. batatas]	76.25		CYP630	CYP559B1	Magnaporthe grisea	0.4742	1e-131
g5240.t1	Cytochrome P450 monooxygenase	[ P450_Fs107 ] fgenesh1_pm.sca_69_chr11_6_0000015 [Fusarium solani f. batatas]	43.29	Pisatin demethylase-like	CYP532	CYP540B9	Aspergillus oryzae	0.3142	5e-67
g5319.t1	cytochrome P450 oxidoreductase	[ P450_Fs069 ] e_gw1.15.347.1 [Fusarium solani f. batatas]	70.56	E-class P450, group I	CYP530	CYP5014F1	Phytophthora ramorum	0.25	4e-35
g5379.t1	pisatin demethylase	[ P450_Fs055 ] e_gw1.32.144.1 [Fusarium solani f. batatas]	81.35		CYP531	CYP5014J1	Phytophthora sojae	0.97	0
g5465.t1	cytochrome P450	[ P450_Nc014 ] NCU05376T0 [Neurospora crassa]	41.63		CYP68	CYP620E1	Aspergillus nidulans	0.2807	3e-31
g5480.t1	putative cytochrome P450 phenylacetate 2-hydroxylase	[ P450_092 ] CLME208814.M [Cladonia metacorallifera]	35.8	E-class P450, group I	CYP504	CYP539B1	Magnaporthe grisea	0.2557	4e-30
g5599.t1	cytochrome P450	[ P450_Fs021 ] e_gw1.60.34.1 [Fusarium solani f. batatas]	77.03	E-class P450, group I	CYP505	CYP528A2	Magnaporthe grisea	0.5519	1e-73
g5862.t1	related to cytochrome P450 monooxygenase (lovA)	[ P450_Fs048 ] e_gw1.14.510.1 [Fusarium solani f. batatas]	79.72	E-class P450, group I	CYP602	CYP5027A1	Ustilago maydis 521	0.4212	1e-115
g564.t1	trichodiene oxygenase cytochrome p450	[ P450_Fo019 ] FOXG_03513 [Fusarium oxysporum]	77.55	E-class P450, group I	CYP580	CYP547C3	Aspergillus oryzae	0.2751	1e-30
g6080.t1	cytochrome P450	[ P450_PCR077 ] CAP97144.1 [Penicillium chrysogenum]	76.04		CYP5052	CYP5015A1	Phytophthora ramorum	0.256	5e-33
g6117.t1	Pisatin demethylase	No matches
g6322.t1	Cytochrome P450	[ P450_Fs039 ] e_gw1.22.190.1 [Fusarium solani f. batatas]	33.2		CYP630	CYP55A6	Neurospora crassa	0.3712	7e-72
g6391.t1	predicted protein [	[ P450_Fs005 ] e_gw1.8.73.1 [Fusarium solani f. batatas]	78.08		CYP532	CYP5093A1	Aspergillus oryzae	0.3581	4e-36
g6420.t1	Alcohol oxidase 1	No matches
g6429.t1	cytochrome p450 oxidoreductase	[ P450_Fs031 ] e_gw1.20.1275.1 [Fusarium solani f. batatas]	64.23	Pisatin demethylase-like	CYP5080	CYP51F1	Fusarium graminearum	0.7947	0
g6448.t1	Cytochrome P450	[ P450_Fo061 ] FOXG_09685 [Fusarium oxysporum]	76.44		CYP61	CYP530A1	Neurospora crassa	0.2376	1e-28
g6543.t1	cytochrome P450	[ P450_Cir2019 ] CIRG_03540 [Coccidioides immitis RMSCC2394]	35.62	P450, CYP52	CYP685	CYP655B1	Aspergillus oryzae	0.7404	1e-46
g6858.t1	Cytochrome P450	[ P450_Ate006 ] ATEG_00738.1 [Aspergillus terreus]	64.71	E-class P450, group I	CYP680	CYP680A1	Aspergillus nidulans	0.2926	4e-50
g6860.t1	NAD(P)-binding protein	[ P450_AnA152 ] gw1.9.669.1 [Aspergillus niger ATCC 1015]	60.12	E-class P450, group I	CYP504	CYP5052C1a	Aspergillus fumigatus	0.4081	7e-88
g6861.t1	Phenylacetate 2-hydroxylase	[ P450_Fs072 ] e_gw1.47.62.1 [Fusarium solani f. batatas]	85	E-class P450, group I	CYP504	CYP616A1	Fusarium graminearum	0.2517	6e-28
g7039.t1	related to NCP1-NADPH-cytochrome P450 reductase	[ P450_Pc002 ] e_gwh2.7.20.1 [Phanerochaete chrysosporium]	29.82	E-class P450, group I	CYP505	CYP5053C1	Aspergillus oryzae	0.6633	0
g7040.t1	cytochrome P450 oxidoreductase	[ P450_Fs015 ] e_gw1.2.810.1 [Fusarium solani f. batatas]	84.09	P450, CYP52	CYP630	CYP539B1	Magnaporthe grisea	0.4868	1e-128
g7414.t1	cytochrome P450	[ P450_Fs110 ] fgenesh1_pm.sca_55_chr13_4_0000011 [Fusarium solani f. batatas]	72.78	E-class P450, group IV	CYP642	CYP665A1	Aspergillus nidulans	0.2902	7e-40
g7774.t1	cytochrome P450	[ P450_Tr062 ] fgenesh1_pm.C_scaffold_29000033 [Trichoderma reesei]	57.99		CYP65	CYP52H2b	Aspergillus fumigatus	0.4776	1e-123
g7818.t1	related to cytochrome P450	[ P450_Fs010 ] e_gw1.26.298.1 [Fusarium solani f. batatas]	64.28	E-class P450, group I	CYP559	CYP570C1	Fusarium graminearum	0.6632	0
g7974.t1	benzoate 4-monooxygenase cytochrome P450	[ P450_Fs093 ] fgenesh1_pm.sca_18_chr2_1_0000256 [Fusarium solani f. batatas]	66.04	Pisatin demethylase-like	CYP65	CYP5014D3	Phytophthora sojae	0.3776	4e-78
g8088.t1	putative helicase	No matches
g8452.t1	cytochrome p450	[ P450_Cg027 ] GLRG_03063T0 [Colletotrichum graminicola M1.001]	63.47		CYP56	CYP5093A2	Aspergillus oryzae	0.2413	4e-34
g8720.t1	C-22 sterol desaturase	[ P450_Fs088 ] estExt_Genewise1Plus.C_sca_82_chr10_2_00600 [Fusarium solani f. batatas]	81.15	E-class P450, group IV	CYP61	CYP539B1	Magnaporthe grisea	0.2573	1e-26
g876.t1	probable benzoate 4-monooxygenase cytochrome P450	[ P450_Fs162 ] estExt_fgenesh1_pm.C_sca_10_chr8_2_00253 [Fusarium solani f. batatas]	71.88	e-class P450, group I	CYP537	CYP530A3	Aspergillus nidulans	0.3964	3e-97
g900.t1	Cell division control protein 42	No matches
g9184.t1	cytochrome P450	[ P450_Fs131 ] fgenesh1_pg.sca_14_chr10_3_0000338 [Fusarium solani f. batatas]	74.56	E-class P450, group I	CYP530	CYP5145A3	Phanerochaete chrysosporium	0.2597	5e-34
g9186.t1	NADPH--cytochrome P450 reductase	[ P450_Pc108 ] gww2.3.2.1 [Phanerochaete chrysosporium]	29.43	E-class P450, group I	CYP505	CYP681A1	Aspergillus nidulans	0.3709	6e-94
g9188.t1	cytochrome P450	[ P450_Fs097 ] fgenesh1_pm.sca_5_chr5_3_0000498 [Fusarium solani f. batatas]	67.32	Pisatin demethylase-like	CYP5080	CYP617A1	Fusarium graminearum	0.3021	1e-35
g9192.t1	Cytochrome P450 monooxygenase patI	[ P450_Fs130 ] fgenesh1_pg.sca_14_chr10_3_0000333 [Fusarium solani f. batatas]	66.6	E-class P450, group I	CYP5069	CYP5014D3	Phytophthora sojae	0.2596	1e-24
g9200.t1	O-methylsterigmatocystin oxidoreductase	[ P450_Fs065 ] e_gw1.29.28.1 [Fusarium solani f. batatas]	73.04	E-class P450, group I	CYP620	CYP58D2	Aspergillus oryzae	0.95	0
g9248.t1	cytochrome p450 3a18	[ P450_Fs092 ] fgenesh1_pm.sca_18_chr2_1_0000195 [Fusarium solani f. batatas]	66.25	E-class P450, group I	CYP616	CYP504B5b	Aspergillus fumigatus	0.2374	3e-38
g9412.t1	fatty acid hydroxylase	[ P450_Tr022 ] TERG_03078T0 [Trichophyton rubrum]	53.24	E-class P450, CYP3A	CYP505	CYP5032A1	Ustilago maydis 521	0.2457	2e-37
g9417.t1	cytochrome P450	[ P450_Ss054 ] SS1G_08677.1 [Sclerotinia sclerotiorum]	46.03	E-class P450, group IV	CYP5085	CYP5085A1b	Aspergillus fumigatus	0.3256	2e-67
g9420.t1	cytochrome P450	[ P450_Cir2022 ] CIRG_04216 [Coccidioides immitis RMSCC2394]	45.29	P450, CYP52	CYP584	CYP641A1	Fusarium graminearum	0.3868	1e-128
g9427.t1	Cytochrome P450 3A12	No matches
g9687.t1	cytochrome P450 6A1	[ P450_EF021 ] EfO2.038040.1 [Epichloe festucae]	46.39	E-class P450, group IV	CYP609	CYP61A1	Magnaporthe grisea	0.2506	6e-24

## Sheet: CBS17727 122seq
Supplementary Table 4. Summary of cytochrome oxydases (CYP) found in the predicted proteome of Nectriaceous fungi						Best hit of Nelson's
AA SeqName	Description (Based on BlastP best hit)	Name of hit [ on Fungal Cytochrome P450 Database]	Identity [%]	P450 Class Name	Putative CPY name	Nelson's P450 Name	Species name	Identity	E-value
g941	cytochrome P450	[ P450_Bc258 ] BC1G_15834 [Botrytis cinerea]	38.7		CYP503	CYP5014G1	Phytophthora ramorum	0.2332	3e-23
g973	cytochrome P450 monooxygenase	[ P450_Ta040 ] 79290 [Trichoderma atroviride]	54.93		CYP526	CYP5139A1	Phanerochaete chrysosporium	0.4314	1e-105
g1000	3	[ P450_Fs050 ] e_gw1.30.236.1 [Fusarium solani f. batatas]	59.72	E-class P450, group I	CYP526	CYP65AF1	Aspergillus oryzae	0.4046	1e-104
g10146	cytochrome P450	[ P450_Ac125 ] Genemark1.10335_g [Aspergillus carbonarius]	60.88	Pisatin demethylase-like	CYP53	CYP5093A2	Aspergillus oryzae	0.2725	3e-39
g10277	putative transporter SEO1	No matches
g10480	related to TRI13-cytochrome P450	[ P450_Fs035 ] e_gw1.9.303.1 [Fusarium solani f. batatas]	78.2	E-class P450, group I	CYP526	CYP657B1b	Aspergillus fumigatus	0.3537	2e-90
g10489	cytochrome P450, family 51 (sterol 14-demethylase)	[ P450_Fs025 ] e_gw1.5.672.1 [Fusarium solani f. batatas]	81.78	E-class P450, group IV	CYP51	CYP526F1	Fusarium graminearum	0.379	1e-106
g10514	related to pisatin demethylase / cytochrome P450 monooxygenase	[ P450_Fs041 ] e_gw1.17.332.1 [Fusarium solani f. batatas]	81.09	E-class P450, group I	CYP531	CYP5037B2	Phanerochaete chrysosporium	0.3927	9e-61
g10825	cytochrome P450	[ P450_Fs110 ] fgenesh1_pm.sca_55_chr13_4_0000011 [Fusarium solani f. batatas]	67.43	E-class P450, group IV	CYP642	CYP665A1	Aspergillus nidulans	0.2902	7e-40
g10912	cytochrome p450	[ P450_Tvg059 ] estExt_Genewise1Plus.C_31078 [Trichoderma virens Gv29-8]	68.55		CYP535	CYP512B1	Phanerochaete chrysosporium	0.4107	1e-112
g1011	Cytochrome P450 4V2	No matches
g11145	alcohol oxidase	No matches
g11149	O-methylsterigmatocystin oxidoreductase	[ P450_Tvg013 ] e_gw1.10.142.1 [Trichoderma virens Gv29-8]	61.91	E-class P450, group I	CYP621	CYP53C2	Phanerochaete chrysosporium	0.3311	2e-54
g11245	cytochrome P450	[ P450_PCR080 ] CAP97511.1 [Penicillium chrysogenum]	82.88	E-class P450, CYP IA	CYP504	CYP616A1	Fusarium graminearum	0.2517	6e-28
g11301	cytochrome P450	[ P450_102 ] CH063_05887T0 [Colletotrichum higginsianum]	43.34	E-class P450, group I	CYP552	CYP5014F1	Phytophthora sojae	0.256	2e-39
g11332	cytochrome P450	[ P450_Fs105 ] fgenesh1_pm.sca_36_chr11_2_0000037 [Fusarium solani f. batatas]	79.56		CYP682	CYP5014B1	Phytophthora ramorum	0.3024	3e-59
g11378	Cytochrome P450 family protein	[ P450_EF018 ] EfO2.034360.1 [Epichloe festucae]	82.38	Pisatin demethylase-like	CYP548	CYP5015G4	Phytophthora sojae	0.2911	1e-33
g11541	Cytochrome P450 61	[ P450_Acl011 ] ACLA_008020 [Aspergillus clavatus NRRL 1]	83.39	E-class P450, group I	CYP61	CYP5144A12	Phanerochaete chrysosporium	0.445	2e-40
g11559	AIG2-like protein	No matches
g11564	related to O-methylsterigmatocystin oxidoreductase	[ P450_Fs007 ] e_gw1.1.1600.1 [Fusarium solani f. batatas]	82.4		CYP5065	CYP548A1	Neurospora crassa	0.3924	2e-93
g11619	HET-domain-containing protein	No matches
g11717	cytochrome P450 4F8	[ P450_AnC083 ] An11g00270 [Aspergillus niger CBS 513.88]	44.14	E-class P450, group IV	CYP5108	CYP51F1	Aspergillus nidulans	0.2378	2e-30
g11889	related to pisatin demethylase (cytochrome P450)	[ P450_Fv005 ] FVEG_00415 [Fusarium verticillioides]	76.17	E-class P450, group I	CYP570	CYP530A2	Fusarium graminearum	0.3959	8e-37
g1185	Cytochrome P450 61	[ P450_Fs088 ] estExt_Genewise1Plus.C_sca_82_chr10_2_00600 [Fusarium solani f. batatas]	84.51	E-class P450, group IV	CYP617	CYP539B1	Magnaporthe grisea	0.2573	1e-26
g12079	Cytochrome P450 3A12	No matches
g12172	cytochrome P450 oxidoreductase	No matches
g12208	aldehyde dehydrogenase (NAD+)	[ P450_Fs101 ] fgenesh1_pm.sca_22_chr7_11_0000091 [Fusarium solani f. batatas]	83.07		CYP578	CYP617D2b	Aspergillus fumigatus	0.2893	3e-33
g12250	pisatin demethylase	[ P450_Fs055 ] e_gw1.32.144.1 [Fusarium solani f. batatas]	80.94		CYP531	CYP535B1	Magnaporthe grisea	0.9937	0
g12464	probable cycloheximide-inducible protein CIP70 (cytochrome P450 family)	[ P450_Fg099 ] FGSG_11536.3 [Fusarium graminearum]	69.84	E-class P450, group IV	CYP54	CYP552C2	Fusarium graminearum	0.6902	0
g12537	related to isotrichodermin C-15 hydroxylase (cytochrome P-450 monooxygenase CYP65A1)	[ P450_Fo078 ] FOXG_10874 [Fusarium oxysporum]	43.11	E-class P450, group I	CYP567	CYP572A1	Magnaporthe grisea	0.4471	8e-38
g12547	related to sterigmatocystin biosynthesis P450 monooxygenase STCS	[ P450_Ate107 ] ATEG_08901.1 [Aspergillus terreus]	67.74	E-class P450, group I	CYP587	CYP587B1	Fusarium graminearum	0.5764	0
g12551	related to cytochrome P450 7B1	[ P450_Fg039 ] FGSG_03498.3 [Fusarium graminearum]	56.52		CYP637	CYP5093A4	Aspergillus oryzae	1	0
g12707	cytochrome P450 6A1	[ P450_Cg010 ] GLRG_01154T0 [Colletotrichum graminicola M1.001]	28		CYP609	CYP5145A3	Phanerochaete chrysosporium	0.2565	4e-37
g12711	related to pisatin demethylase cytochrome P450	[ P450_Fg037 ] FGSG_03260.3 [Fusarium graminearum]	59.78		CYP5080	CYP584G1	Aspergillus oryzae	0.4143	1e-99
g12780	cytochrome P450	No matches
g1315	Flap endonuclease	No matches
g1765	related to trichodiene oxygenase cytochrome P450	[ P450_Fo019 ] FOXG_03513 [Fusarium oxysporum]	75.17	E-class P450, group I	CYP580	CYP547C3	Aspergillus oryzae	0.2751	1e-30
g1823	averantin oxidoreductase	[ P450_Vd042 ] VDAG_06706 [Verticillium dahliae VdLs. 17]	65.75	Pisatin demethylase-like	CYP65	CYP5014G1	Phytophthora sojae	0.8504	1e-177
g179	MFS general substrate transporter	[ P450_Afl088 ] AFL2G_07229 [Aspergillus flavus]	44.23		CYP58	CYP55A6	Neurospora crassa	0.3234	7e-45
g2036	NADPH--cytochrome P450 reductase	[ P450_Pc002 ] e_gwh2.7.20.1 [Phanerochaete chrysosporium]	30.4	E-class P450, group I	CYP505	CYP5053C1	Aspergillus oryzae	0.6633	0
g2037	cytochrome P450 oxidoreductase	[ P450_Fo016 ] FOXG_03207 [Fusarium oxysporum]	81.2	E-class P450, group I	CYP630	CYP620H3	Aspergillus oryzae	0.3364	4e-30
g2123	cytochrome p450	[ P450_Fs024 ] e_gw1.5.1131.1 [Fusarium solani f. batatas]	68.53	E-class P450, group I	CYP534	CYP528A2	Magnaporthe grisea	0.5683	1e-137
g2124	cupin -type protein	[ P450_Tt018 ] estExt_fgenesh2_pm.C_21000 [Thielavia terrestris]	48.68	E-class P450, group I	CYP534	CYP590A1	Magnaporthe grisea	1	0
g2440	benzoate 4-monooxygenase cytochrome P450	[ P450_Fs127 ] fgenesh1_pg.sca_6_chr9_2_0000613 [Fusarium solani f. batatas]	58.96	E-class P450, group I	CYP680	CYP504B5b	Aspergillus fumigatus	0.2725	1e-47
g2765	putative f-box domain protein	No matches
g2830	cytochrome P450	[ P450_001 ] CH063_00006T0 [Colletotrichum higginsianum]	64.6	E-class P450, group I	CYP537	CYP5158A2P	Phanerochaete chrysosporium	0.4503	1e-34
g2856	O-methylsterigmatocystin oxidoreductase	[ P450_Fs038 ] e_gw1.22.33.1 [Fusarium solani f. batatas]	62.07	E-class P450, CYP2D	CYP620	CYP530A3	Aspergillus nidulans	0.2526	5e-31
g2859	related to pisatin demethylase / cytochrome P450 monooxygenase	No matches
g2860	cytochrome P450 oxidoreductase	[ P450_Fs063 ] e_gw1.29.200.1 [Fusarium solani f. batatas]	74.39	Pisatin demethylase-like	CYP5078	CYP53C1	Ustilago maydis 521	0.5194	1e-139
g237	cytochrome P450	No matches
g3129	high-affinity iron permease-like protein	No matches
g3851	cytochrome P450	[ P450_Tvg054 ] e_gw1.14.457.1 [Trichoderma virens Gv29-8]	42.44	Pisatin demethylase-like	CYP65	CYP5150A4	Phanerochaete chrysosporium	0.5072	1e-145
g3875	related to n-alkane-inducible cytochrome P450	[ P450_Fs018 ] e_gw1.2.182.1 [Fusarium solani f. batatas]	69.51	P450, CYP52	CYP584	CYP539A3	Fusarium graminearum	0.5557	0
g306	related to cytochrome P450 monooxygenase (lovA)	[ P450_Fs048 ] e_gw1.14.510.1 [Fusarium solani f. batatas]	74.6	E-class P450, group I	CYP602	CYP5027A1	Ustilago maydis 521	0.4212	1e-115
g4078	Bifunctional P-450:NADPH-P450 reductase	[ P450_Fo022 ] FOXG_04152 [Fusarium oxysporum]	68.48		CYP505	CYP512G2	Phanerochaete chrysosporium	0.4043	4e-93
g4100	related to n-alkane-inducible cytochrome P450	[ P450_Fo001 ] FOXG_00101 [Fusarium oxysporum]	71.13		CYP539	CYP5145A1	Phanerochaete chrysosporium	0.2738	2e-39
g4313	related to cytochrome P450 7B1	[ P450_Fo052 ] FOXG_07659 [Fusarium oxysporum]	43.24		CYP550	CYP620F1b	Aspergillus fumigatus	0.2255	1e-33
g4338	NADP/FAD dependent oxidoreductase	[ P450_Po9014 ] fgenesh1_kg.3_ [Pleurotus ostreatus PC9]	29.87	E-class P450, group I	CYP505	CYP684A1	Aspergillus nidulans	0.2659	1e-21
g4339	cytochrome P450 oxidoreductase	[ P450_Fs116 ] fgenesh1_pg.sca_31_chr3_5_0000112 [Fusarium solani f. batatas]	81.03	E-class P450, group I	CYP630	CYP5150A2	Phanerochaete chrysosporium	0.5056	1e-145
g4361	cytochrome P450	[ P450_Fs121 ] fgenesh1_pg.sca_20_chr6_4_0000622 [Fusarium solani f. batatas]	52.4	E-class P450, group I	CYP52	CYP5014D3	Phytophthora sojae	0.3658	1e-80
g4423	Major facilitator superfamily domain, general substrate transporter	No matches
g4444	probable cytochrome P450 305a1	No matches
g4458	cytochrome P450	[ P450_Ta019 ] 30243 [Trichoderma atroviride]	51.36	Pisatin demethylase-like	CYP65	CYP5014D1	Phytophthora sojae	0.3245	3e-61
g4485	cytochrome P450 71D8	No matches
g4486	Cytochrome P450 monooxygenase cypX	No matches
g4696	related to mixed-linked glucanase precursor MLG1	No matches
g4708	related to cytochrome P450 monooxygenase	[ P450_Fv107 ] FVEG_12501 [Fusarium verticillioides]	58.66	Pisatin demethylase-like	CYP65	CYP5144C5	Phanerochaete chrysosporium	0.3866	7e-97
g5243	nadph-cytochrome p450 reductase	[ P450_Pc002 ] e_gwh2.7.20.1 [Phanerochaete chrysosporium]	28.75	E-class P450, group I	CYP505	CYP5053C1	Aspergillus oryzae	0.6633	0
g5284	Squalene monooxygenase	No matches
g5295	cytochrome P450	[ P450_St014 ] e_gw1.1.596.1 [Sporotrichum thermophile]	64.28	E-class P450, group I	CYP629	CYP620H3	Aspergillus oryzae	0.2722	5e-32
g5522	O-methylsterigmatocystin oxidoreductase	[ P450_Fs065 ] e_gw1.29.28.1 [Fusarium solani f. batatas]	70.96	E-class P450, group I	CYP620	CYP58D2	Aspergillus oryzae	0.95	0
g5671	bifunctional P-450:NADPH-P450 reductase	[ P450_Fs129 ] fgenesh1_pg.sca_82_chr10_2_0000349 [Fusarium solani f. batatas]	78.2	E-class P450, group I	CYP505	CYP5069A1c	Aspergillus fumigatus	0.3562	3e-24
g5686	phytanoyl-CoA dioxygenase family protein	No matches
g5788	related to pisatin demethylase / cytochrome P450 monooxygenase	No matches
g5789	Heterokaryon incompatibility protein 6, OR allele	No matches
g6011	related to benzoate 4-monooxygenase cytochrome P450	[ P450_Fg079 ] FGSG_09671.3 [Fusarium graminearum]	53.22	E-class P450, group I	CYP616	CYP5053C1	Aspergillus oryzae	0.5292	1e-136
g6141	cytochrome P450 oxidoreductase	[ P450_Fs022 ] e_gw1.61.48.1 [Fusarium solani f. batatas]	78.01		CYP630	CYP559B1	Magnaporthe grisea	0.4742	1e-131
g6143	NADPH--cytochrome P450 reductase	[ P450_Pc108 ] gww2.3.2.1 [Phanerochaete chrysosporium]	31.78	E-class P450, group I	CYP505	CYP681A1	Aspergillus nidulans	0.3709	6e-94
g6378	cytochrome P450 monooxygenase-like protein	No matches
g6521	benzoate 4-monooxygenase cytochrome P450	[ P450_Fs093 ] fgenesh1_pm.sca_18_chr2_1_0000256 [Fusarium solani f. batatas]	62.57	Pisatin demethylase-like	CYP65	CYP5014D3	Phytophthora sojae	0.3776	4e-78
g6549	related to cytochrome P450 monooxygenase	[ P450_Fo160 ] FOXG_17420 [Fusarium oxysporum]	62.08	Pisatin demethylase-like	CYP65	CYP5144C5	Phanerochaete chrysosporium	0.3866	7e-97
g6734	related to cytochrome p450	[ P450_Fs009 ] e_gw1.18.1867.1 [Fusarium solani f. batatas]	69.9	E-class P450, group I	CYP621	CYP548A3	Fusarium graminearum	0.7609	0
g6915	cytochrome p450 benzoate 4-monooxygenase	[ P450_Pm008 ] EEA27553.1 [Penicillium marneffei]	71.7	Pisatin demethylase-like	CYP53	CYP5015C1	Phytophthora sojae	0.2524	7e-34
g6930	cytochrome P450	[ P450_Tt003 ] e_gw1.3.451.1 [Thielavia terrestris]	72.06	E-class P450, group I	CYP663	CYP540B1	Magnaporthe grisea	0.7878	0
g601	Eburicol 14-alpha-demethylase	[ P450_Fs085 ] estExt_Genewise1.C_sca_1_chr1_3_00465 [Fusarium solani f. batatas]	88.99	E-class P450, group IV	CYP51	CYP61	Ustilago maydis 521	0.504	1e-143
g658	cytochrome P450	[ P450_Fs156 ] estExt_fgenesh1_pg.C_sca_1_chr1_3_00312 [Fusarium solani f. batatas]	69.45		CYP617	CYP618A1	Fusarium graminearum	0.4921	1e-138
g7293	cytochrome P450	[ P450_Ta064 ] 89429 [Trichoderma atroviride]	52.35	E-class P450, group I	CYP59	CYP59D1	Aspergillus oryzae	0.2966	1e-54
g7304	cytochrome P450, family 17, subfamily A (steroid 17alpha-monooxygenase)	[ P450_Fv112 ] FVEG_13079 [Fusarium verticillioides]	59.15	E-class P450, group I	CYP5063	CYP5037B3	Phanerochaete chrysosporium	0.3823	1e-60
g7305	MFS monocarboxylate transporter	[ P450_Mgy035 ] MGYG_03812 [Microsporum gypseum]	25.11	E-class P450, group I	CYP623
g7343	related to flavoprotein involved in K+ transport	No matches
g7347	3-hydroxyacid dehydrogenase/reductase	No matches
g7398	cytochrome P450	[ P450_Mf063 ] e_gw1.18.265.1 [Mycosphaerella fijiensis]	53.95	Pisatin demethylase-like	CYP65	CYP630D2P	Aspergillus oryzae	1	1e-113
g7615	cytochrome P450	[ P450_Tvg013 ] e_gw1.10.142.1 [Trichoderma virens Gv29-8]	58.94	E-class P450, group I	CYP621	CYP53C2	Phanerochaete chrysosporium	0.3311	2e-54
g7734	isotrichodermin C-15 hydroxylase	[ P450_Ao152 ] AO090166000099 [Aspergillus oryzae]	65.45		CYP673	CYP5026B1	Ustilago maydis 521	1	0
g7851	cytochrome p450	[ P450_Fg014 ] FGSG_01786.3 [Fusarium graminearum]	38.41	Pisatin demethylase-like	CYP5063	CYP548H1	Aspergillus oryzae	0.4848	1e-128
g7892	NADPH--cytochrome P450 reductase	[ P450_Fg017 ] FGSG_01972.3 [Fusarium graminearum]	26.64	E-class P450, group I	CYP505	CYP5076A1	Aspergillus nidulans	0.4403	1e-107
g7893	cytochrome p450 monooxygenase	[ P450_Fs011 ] e_gw1.26.154.1 [Fusarium solani f. batatas]	61.84	Pisatin demethylase-like	CYP630	CYP65Q1	Fusarium graminearum	0.5072	1e-146
g7908	cytochrome P450 oxidoreductase	[ P450_Fg095 ] FGSG_11389.3 [Fusarium graminearum]	73.56		CYP530	CYP680A1	Aspergillus nidulans	0.2774	8e-40
g7914	cytochrome p450	[ P450_Af1022 ] EDP53306.1 [Aspergillus fumigatus A1193]	36.36	Pisatin demethylase-like	CYP5078	CYP65A2	Fusarium graminearum	0.4863	1e-135
g8062	Eburicol 14-alpha-demethylase	[ P450_Fs030 ] e_gw1.20.745.1 [Fusarium solani f. batatas]	70.89		CYP51	CYP505A7	Fusarium graminearum	0.6721	0
g8066	cytochrome P450 oxidoreductase	No matches
g8077	3-hydroxyphenylacetate 6-hydroxylase	[ P450_Fo051 ] FOXG_07489 [Fusarium oxysporum]	78.95	E-class P450, group I	CYP504	CYP530A3	Aspergillus nidulans	0.2593	3e-30
g8152	cytochrome p450 monooxygenase	[ P450_Fs002 ] gw1.60.10.1 [Fusarium solani f. batatas]	69.32	P450, CYP52	CYP578	CYP52G2a	Aspergillus fumigatus	0.5097	1e-136
g8254	Cytochrome P450 55A3	[ P450_Fs027 ] e_gw1.33.219.1 [Fusarium solani f. batatas]	74.81		CYP55	CYP5090A1b	Aspergillus fumigatus	0.6222	1e-163
g8318	related to pisatin demethylase cytochrome P450	[ P450_Fg037 ] FGSG_03260.3 [Fusarium graminearum]	57.11		CYP5080	CYP584G1	Aspergillus oryzae	0.4143	1e-99
g8324	cytochrome P450	[ P450_Cgo040 ] CHG05266.1 [Chaetomium globosum CBS 148.51]	63.48	E-class P450, group IV	CYP56	CYP56C1	Aspergillus oryzae	0.54	1e-153
g8336	radH flavin-dependent halogenase	[ P450_Afl090 ] AFL2G_07275 [Aspergillus flavus]	60.65			CYP55A5v2	Aspergillus oryzae	0.3135	4e-33
g8572	cytochrome P450 3 monooxygenase	[ P450_Fs120 ] fgenesh1_pg.sca_20_chr6_4_0000315 [Fusarium solani f. batatas]	70.76	E-class P450, group I	CYP665	CYP617D4	Aspergillus oryzae	0.2657	3e-22
g8718	predicted protein	No matches
g8915	Benzoate 4-monooxygenase	[ P450_Fs014 ] e_gw1.44.98.1 [Fusarium solani f. batatas]	77.6	Pisatin demethylase-like	CYP53	CYP602B1	Fusarium graminearum	0.6853	0
g8928	Cytochrome P450	[ P450_125 ] CH063_07685T0 [Colletotrichum higginsianum]	73.37	E-class P450, group I	CYP541	CYP5015E7	Phytophthora sojae	0.2483	3e-32
g8948	cytochrome P450	[ P450_Cp115 ] estExt_fgenesh1_pm.C_60459 [Cryphonectria parasitica]	50.49		CYP606	CYP63A3	Phanerochaete chrysosporium	0.2312	5e-23
g8978	benzoate 4-monooxygenase cytochrome P450, putative	[ P450_Pm100 ] EEA20889.1 [Penicillium marneffei]	75.09		CYP577	CYP582A1	Magnaporthe grisea	0.2524	7e-27
g9308	related to cytochrome P450	[ P450_Tr064 ] estExt_GeneWisePlus.C_310084 [Trichoderma reesei]	50.73	E-class P450, group IV	CYP559	CYP56C1	Aspergillus oryzae	0.3929	4e-97
g9325	cytochrome P450	[ P450_Ate006 ] ATEG_00738.1 [Aspergillus terreus]	65.87	E-class P450, group I	CYP680	CYP680A1	Aspergillus nidulans	0.2926	4e-50
g9381	Carnitine monooxygenase oxygenase subunit	No matches
g9393	cytochrome P450 oxidoreductase	[ P450_Fs069 ] e_gw1.15.347.1 [Fusarium solani f. batatas]	67.54	E-class P450, group I	CYP530	CYP5014F1	Phytophthora ramorum	0.25	4e-35
g9401	cytochrome p450	[ P450_Cg072 ] GLRG_08937T0 [Colletotrichum graminicola M1.001]	69.5	E-class P450, CYP2A	CYP505	CYP620A1	Fusarium graminearum	0.3405	7e-29
g9609	cytochrome p450 oxidoreductase	No matches
g9620	Cell division control protein 42	No matches
g9643	probable benzoate 4-monooxygenase cytochrome P450	[ P450_Fs162 ] estExt_fgenesh1_pm.C_sca_10_chr8_2_00253 [Fusarium solani f. batatas]	66.66	E-class P450, group I	CYP537	CYP530A3	Aspergillus nidulans	0.3964	3e-97
g9876	related to pisatin demethylase cytochrome P450	[ P450_Fs005 ] e_gw1.8.73.1 [Fusarium solani f. batatas]	79.14		CYP532	CYP5093A1	Aspergillus oryzae	0.3581	4e-36
